# Supplementary material for: Population Genomic Analyses Suggest a Hybrid Origin, Cryptic Sexuality, and Decay of Genes Regulating Seed Development for the Putatively Strictly Asexual Kingdonia uniflora (Circaeasteraceae, Ranunculales)
Source: MDPI journal article supplement (doi:10.3390/ijms24021451), 2023-01-11
Supplement: s1 [file s1]

```

1  #!/usr/bin/perl
2  # use strict;
3  #FL1, fasta格式文件
4  #FL2, 序列名称, 不含有>符号
5
6  open (FL0, "$ARGV[0]") || die ;
7  open (FL1, ">$ARGV[1]") || die ;
8  open (FL2, ">$ARGV[2]") || die ;
9
10 while (<FL0>){
11     chomp;
12     if ($_=~ /\^>/){
13         $_ =~ s/\>.*\+(.*)/$1/;
14         print FL1 ">".$_."\n";
15         push (@list, ">".$_."\n");}
16     else {
17         print FL1 $_."\n";
18         push (@list, $_."\n");}
19 }
20
21
22 # @list=<FL0>;
23 chomp @list;
24
25 print $list[0];
26
27 for($j=0;$j<@list;$j+=2){
28     $ref1{$list[$j]}=$list[$j+1];}
29
30
31 @keys =keys %ref1;
32 print $keys[1], "\t";
33
34 while (my ($k,$v)=each %ref1){print FL2 "$k\n$v\n"}

```
