# Supplementary material for: Population Genomic Analyses Suggest a Hybrid Origin, Cryptic Sexuality, and Decay of Genes Regulating Seed Development for the Putatively Strictly Asexual Kingdonia uniflora (Circaeasteraceae, Ranunculales)
Source: MDPI journal article supplement (doi:10.3390/ijms24021451), 2023-01-11
Supplement: s1 [file s1]

```
1  #!/usr/bin/perl
2  # use strict;
3  #FL1, fasta格式文件
4  #FL2, 序列名称, 不含有>符号
5  open(FL0, "$ARGV[0]") || die ;
6  open (OUT1, ">$ARGV[1]") || die ;
7  open (OUT2, ">$ARGV[2]") || die ;
8
9
10 @arr1=<FL0>;
11 chomp @arr1;
12
13 for($i=0;$i<@arr1;$i++){
14 # @tep=split(/\s/, $arr1[$i]);
15 # $step[0] =~ s/^>(.*?)\-mRNA.*$/1/;
16 # $ref1{$step[0]}=$arr1[$i+1];
17     if ($arr1[$i] =~ /\./){
18         # push (@inter,$arr1[$i]);
19         print OUT2 $arr1[$i-1], "\n", $arr1[$i], "\n";}
20     elsif ($arr1[$i] !~ /\^>/){
21         # push (@nointer,$step[0]);
22         print OUT1 $arr1[$i-1], "\n", $arr1[$i], "\n";}
23 }
24
```
