# Supplementary material for: Population Genomic Analyses Suggest a Hybrid Origin, Cryptic Sexuality, and Decay of Genes Regulating Seed Development for the Putatively Strictly Asexual Kingdonia uniflora (Circaeasteraceae, Ranunculales)
Source: MDPI journal article supplement (doi:10.3390/ijms24021451), 2023-01-11
Supplement: s1 [file s1]

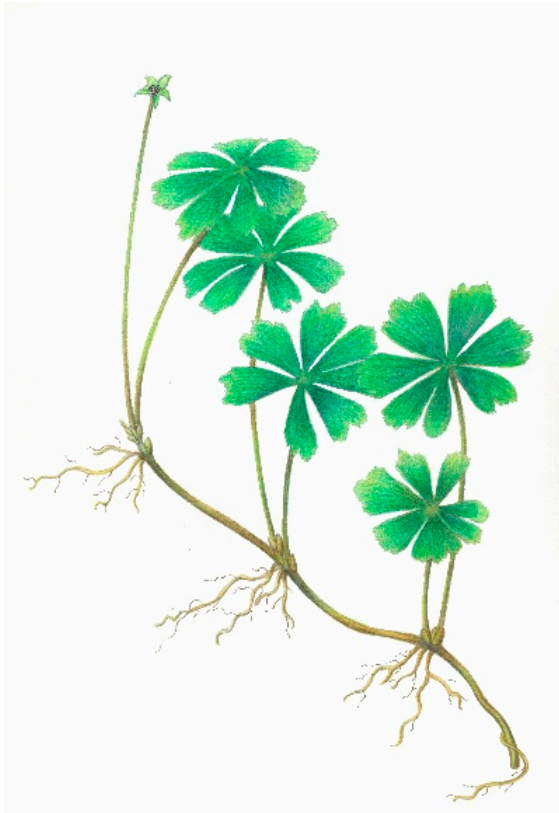

Supplemental Figure S1 Asexual reproduction via rhizome buds observed in *K. uniflora*. New individuals are formed by means of rhizome rupture, which occurs on rhizomes more than three years old.

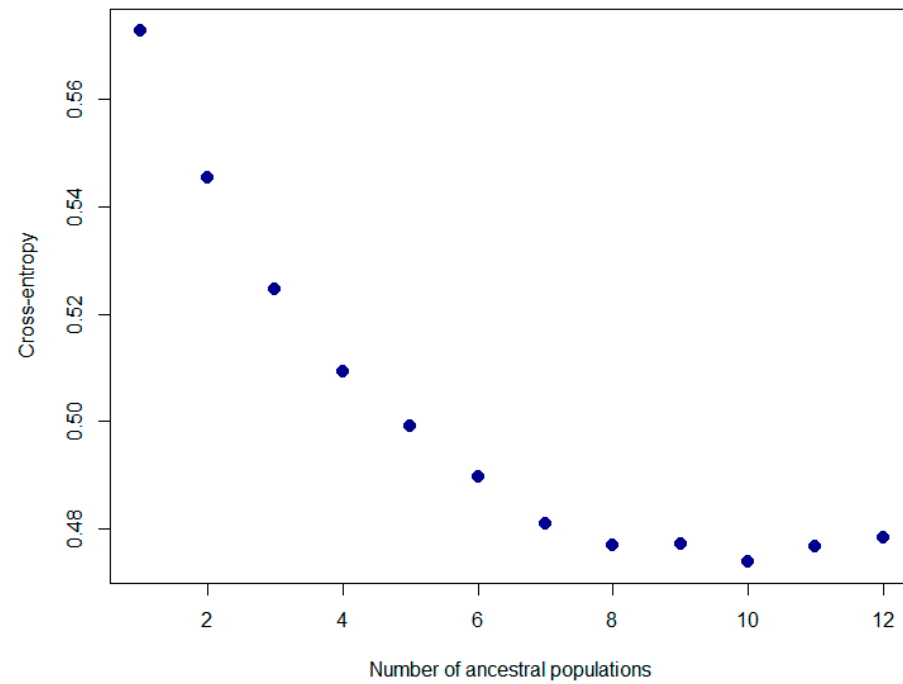

Supplemental Figure S2 Values of the cross-entropy criterion of  $K$  (2-12) predefined in the LEA (Landscape and Ecological Association) analysis.

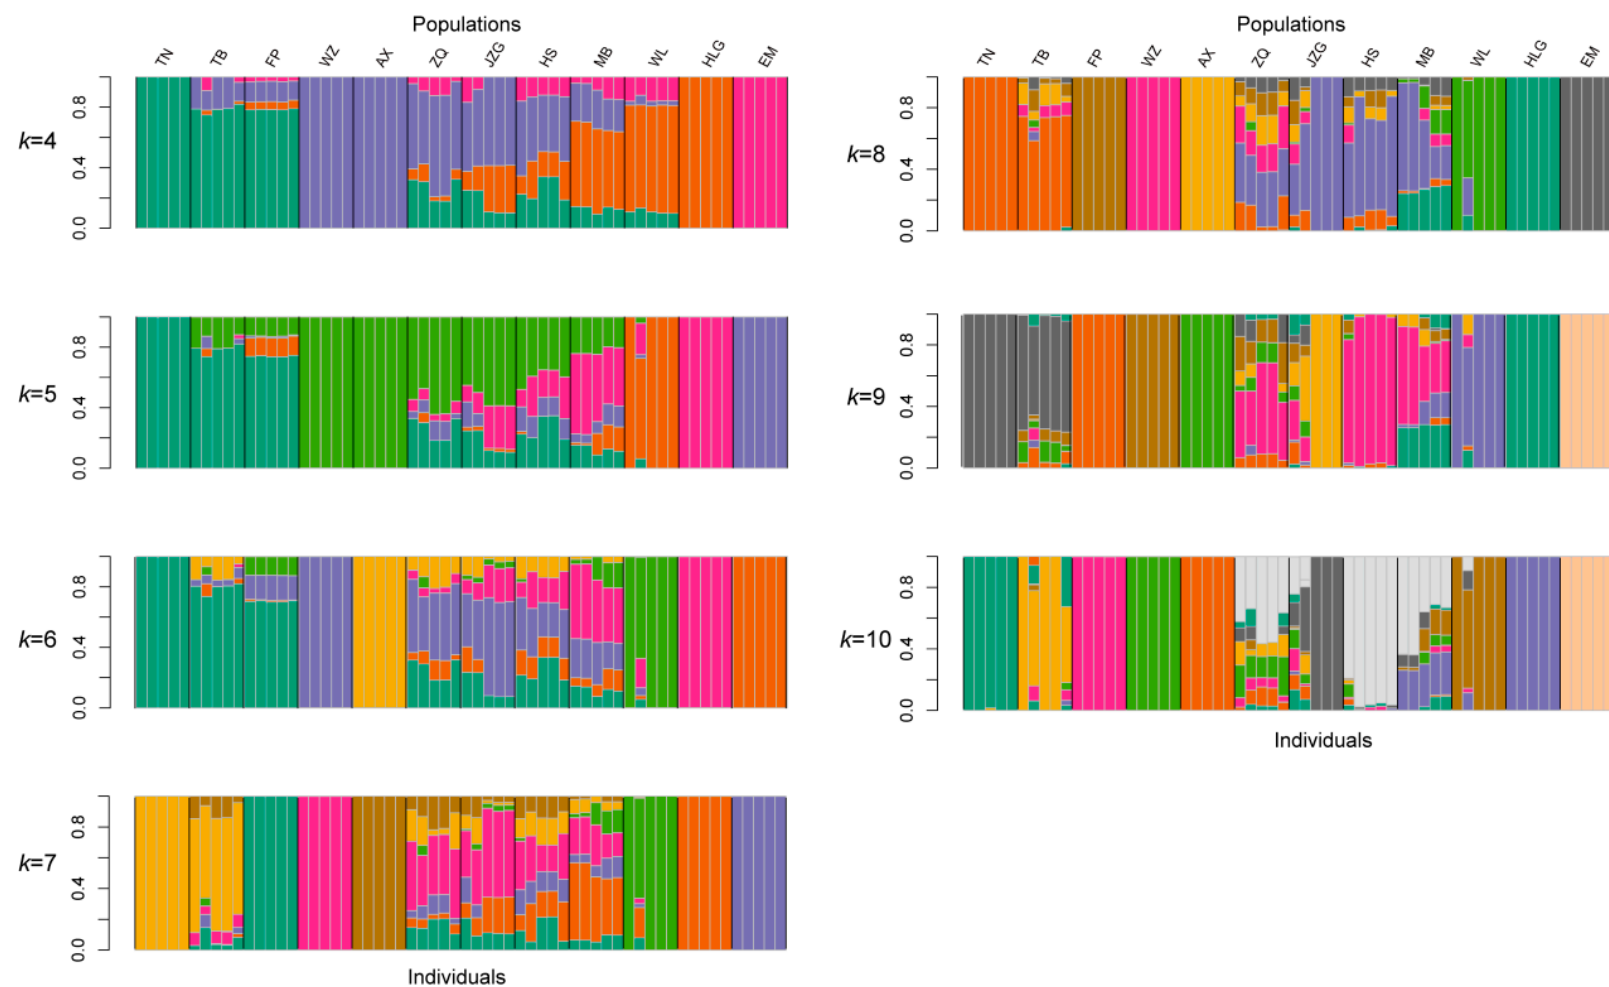

Supplemental Figure S3 Genetic groups of *K. uniflora* inferred by LEA (Landscape and Ecological Association) analysis when setting  $K=4-10$ .

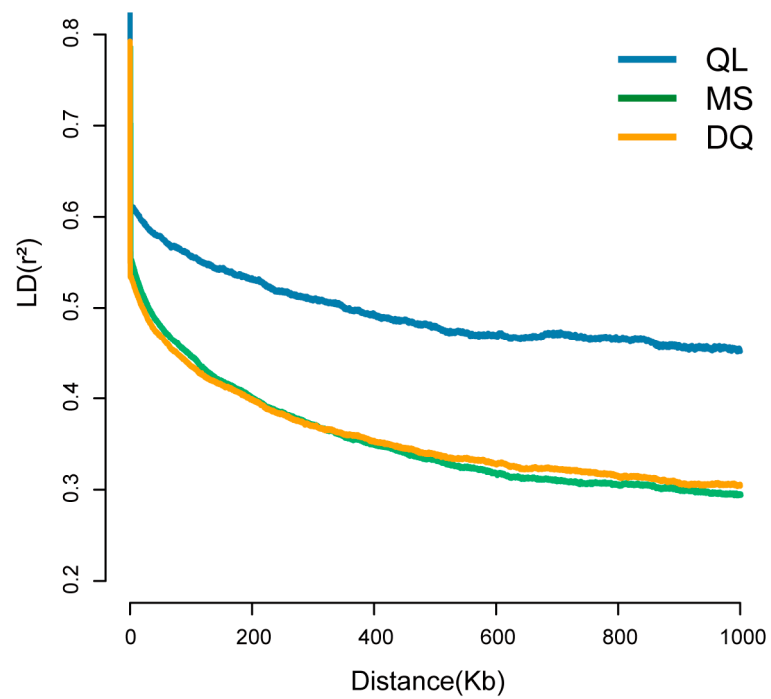

Supplemental Figure S5 Decay of linkage disequilibrium (LD) with physical distance in three genetic groups of *Kingdonia uniflora*. Averages of pairwise linkage disequilibrium measures  $r^2$  are plotted for each bin of distances between pairs of SNPs. The displayed data are for the bins with pairs of SNPs separated by  $\leq 1000$  kb

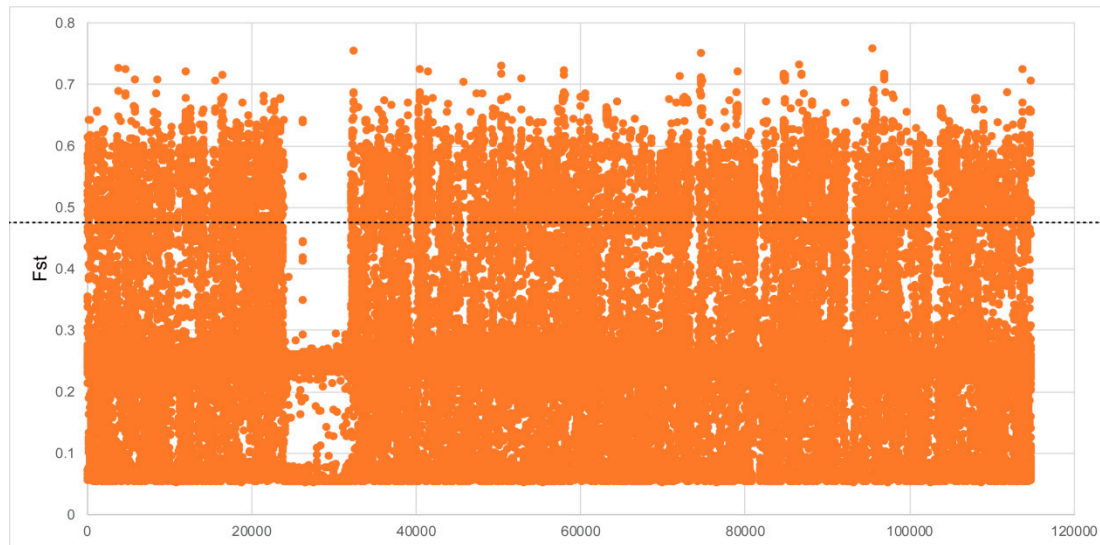

Supplemental Figure S6  $F_{ST}$  values of 1, 114,746 SNPs among 60 *K. uniflora* individuals calculated by BAYESCAN. The x-axis represents the sequence number of SNPs. The black dash line indicates the cut-off line between identified outliers and non-outliers.

Supplemental Table S1. Information of resequencing reads for each individual of *K. uniflora*.

| Samples | Raw Reads  | Clean Reads | Depths of coverage | Accession number |
|---------|------------|-------------|--------------------|------------------|
| TN1     | 51,027,738 | 50,765,637  | 34.8               |                  |
| TN2     | 46,756,886 | 46,510,276  | 31.8               |                  |
| TN3     | 43,249,393 | 43,003,486  | 29.4               |                  |
| TN4     | 40,951,869 | 40,730,366  | 27.8               |                  |
| TN5     | 35,584,733 | 35,400,146  | 24.2               |                  |
| WL1     | 39,375,744 | 39,152,228  | 26.8               |                  |

---

|      |            |            |      |
|------|------------|------------|------|
| WL3  | 38,903,937 | 38,656,346 | 26.4 |
| WL5  | 32,546,125 | 32,354,786 | 22.2 |
| WL6  | 40,671,643 | 40,437,678 | 27.6 |
| WL7  | 40,628,675 | 40,369,729 | 27.6 |
| ZQ7  | 39,963,786 | 39,716,297 | 27.2 |
| ZQ3  | 43,615,885 | 43,338,862 | 29.6 |
| ZQ5  | 39,464,945 | 39,215,846 | 26.8 |
| ZQ4  | 42,635,467 | 42,337,173 | 29   |
| ZQ1  | 36,531,497 | 36,338,066 | 24.8 |
| TB1  | 49,077,603 | 48,767,309 | 33.4 |
| TB3  | 36,688,363 | 36,419,033 | 24.8 |
| TB5  | 36,043,511 | 35,841,078 | 24.4 |
| TB7  | 34,603,411 | 34,404,621 | 23.6 |
| TB9  | 33,058,875 | 32,834,357 | 22.4 |
| WZ3  | 32,444,070 | 32,264,793 | 22   |
| WZ4  | 31,827,747 | 31,640,452 | 21.6 |
| WZ2  | 38,015,892 | 37,806,436 | 25.8 |
| WZ1  | 33,340,675 | 33,165,931 | 22.6 |
| WZ5  | 32,249,336 | 32,098,812 | 22   |
| AX4  | 44,142,701 | 43,819,874 | 30   |
| AX9  | 39,948,467 | 39,686,180 | 27.2 |
| AX2  | 46,043,925 | 45,720,425 | 31.2 |
| AX7  | 40,578,295 | 40,309,818 | 27.6 |
| AX3  | 44,243,655 | 43,939,354 | 30   |
| HS11 | 42,256,873 | 42,000,749 | 28.8 |
| HS10 | 38,244,010 | 37,978,069 | 26   |

---

---

|       |            |            |      |
|-------|------------|------------|------|
| HS8   | 44,571,367 | 44,308,766 | 30.4 |
| HS6   | 42,268,519 | 41,741,309 | 28.6 |
| HS5   | 38,612,247 | 38,343,519 | 26.2 |
| HLG5  | 47,973,012 | 47,710,146 | 32.6 |
| HLG9  | 36,452,284 | 36,221,647 | 24.8 |
| HLG7  | 33,623,575 | 33,423,989 | 22.8 |
| HLG1  | 36,023,575 | 35,809,342 | 24.4 |
| HLG3  | 41,629,174 | 41,390,763 | 28.4 |
| EM5   | 38,462,035 | 38,223,491 | 26.2 |
| EM3   | 48,005,189 | 47,699,822 | 32.6 |
| EM4   | 43,659,391 | 43,388,140 | 29.6 |
| EM1   | 46,241,281 | 45,994,988 | 31.4 |
| EM2   | 38,572,766 | 38,338,167 | 26.2 |
| JZG8  | 36,086,631 | 35,846,991 | 24.6 |
| JZG9  | 34,921,693 | 34,679,138 | 23.8 |
| JZG10 | 39,978,799 | 39,671,802 | 27.2 |
| JZG11 | 36,920,939 | 36,662,409 | 25   |
| JZG12 | 40,321,785 | 40,074,994 | 27.4 |
| MB7   | 44,455,962 | 44,216,766 | 30.2 |
| MB4   | 35,638,763 | 35,419,345 | 24.2 |
| MB3   | 32,680,176 | 32,389,467 | 22.2 |
| MB1   | 33,730,641 | 33,526,920 | 23   |
| MB2   | 37,421,816 | 37,162,369 | 25.4 |
| FP1   | 39,533,969 | 39,370,526 | 27   |
| FP2   | 37,436,213 | 37,258,503 | 25.4 |
| FP3   | 37,633,695 | 37,443,969 | 25.6 |

---

|     |            |            |      |
|-----|------------|------------|------|
| FP4 | 34,378,288 | 34,203,388 | 23.4 |
| FP5 | 34,930,795 | 34,759,707 | 23.8 |

Supplemental Table S3. Premature stop codons (\*) detected in genes related with seed development.

| Gene and individual name | Positions of premature stop codons                                                                                                                                                                                                                                                                                                                                                                                                                      |
|--------------------------|---------------------------------------------------------------------------------------------------------------------------------------------------------------------------------------------------------------------------------------------------------------------------------------------------------------------------------------------------------------------------------------------------------------------------------------------------------|
| KingUnif05328.1_MB4      | MLK*QIPYFICAGETSWIAKSALSSALSNLNPEDSFSIIAFNGNTYLFSSSLEPATKETI<br>EKAIEWINMNFIAGGGRNRTSGSQAGGHMKPTLSLGTSDIVFTQQVEYGQPMPLYESRH<br>LHALKRVRGSGGRFVNTKKMEESNDQNASNVGFLQRGHENRTGSEHLQSEVSNAFASATS<br>CFDVNIVSTGDTLLRQSDLRFRGYPPQ*                                                                                                                                                                                                                             |
| KingUnif30787.1_MB1      | MAPVSFEQTSKKVCVMDASGRLGSSLVDRLLQRGYIVHAAIQNNGIMNCDNNKKNLRVFR<br>SDPFDYHSIINALRGCSALFYTFEPPQEQPIFDEFTAEEEVRAAHNVLEACAQTETVEKV<br>VFTSSVTAAIWREDRSKSSQDFDERHWSVDNFCRKFKLWHALSKTLAERTAWALAKDRDV<br>SMVSINAGLLLGPESVKHPYLKGTAEFMFEDGVFVTVDLIFLVDAAHIAVFEDVSTYGRYF<br>CFNHVINRPEDAVQFAQMLTPSPPPPPPLESCEDSTVHQQRISNKKLNKVMVDYGMVDEE<br>AIEVENDYYQI*RFYHLIMLGEQRRCLRLLAEDVINEADEEVGVAAEETVAVETEIGNM<br>LPVFRLETCFCYNHISFLEVFIYIGGCFRFCYNQQSFLEEVFHVGGADVPELEV* |
| KingUnif03794.1_TB9      | MMDFFRPVLQITTITGPVDICVSDGTLLISCELSISEVNKLQIGSIVRLISTRGFPVHYV<br>GAATHNRQTKSRIQGWDPTISNLKFHDFTVPPFLNHIPNPNSSDKFPTYLIPTFDAERY<br>LREPLAAFLKTLNQNRIVVIRDSLMCFAAEEASFHHNAEAYYFNSSCSIFANVYYFWEF<br>IGKPADGGNLIPSYVPVGRGSWEGCFNDDFCEAVERNREYMNTKLSTGDLYNTCDPIEGEF<br>MKNLTQHPILGENKNKWAIGPLNPMHLDSKMNQTNKCIKWLNIQSPNLVIYVSFGTMISI<br>SDEQITELALRLERSKQMFIVVLRDADCGDIYAVKEELRKIQLPDGYEDRVEGVGLIIRD<br>WAPQLDILAHSTTGGFMSL*LELLHGEPQHGCTHCSLPHADGSTF*           |
| KingUnif11633.1_WL1      | MMDQQGEFKGKVCVTGASGYLASWLVRLLLSGYQVRGTVRDPGNHGLKHLWQLEGAKE<br>RLELVKAELMEEGSFDEAIMGCEGVEILDPAIKGTRNVLNSCKKNPSLNRVLTSSSTAL<br>RTRVDFDSKVPLDESSWSSEDYCQELKVTKKHEDITDV*IGLKQITDVNVVPIDCAHGRY                                                                                                                                                                                                                                                               |



LCSSFVLGNNDLVSILAKRYPSLPVPERFEQLDGPDEFNTSKL\*

Supplemental Table S4. All known extant populations of *K. uniflora*. Location information of the sampled *K. uniflora* populations are indicated with bold characters (*n*, number of individuals analyzed).

| Group | Population | <i>n</i> | Longitude ( <i>E</i> ) | Latitude ( <i>N</i> ) | Altitude (m) | Voucher specimens information |
|-------|------------|----------|------------------------|-----------------------|--------------|-------------------------------|
| QL    | FP         | 5        | 107°48'55"             | 33°42'29"             | 2638         | Zhang & Zhang19001            |
|       | TB         | 5        | 107°48'29"             | 34°0'6"               | 3206         | Zhang & Zhang19002            |
|       | TN         | 5        | 107°46'43"             | 33°54'52"             | 3101.5       | Zhang & Zhang19003            |
|       | AX         | 5        | 103°33'54"             | 33°45'3"              | 3162         | Zhang & Zhang19004            |
|       | HS         | 5        | 102°46'59"             | 32°14'29"             | 3553         | Zhang & Zhang19005            |
|       | JZG        | 5        | 103°43'34"             | 33°2'38"              | 3534         | Zhang & Zhang19006            |
|       | WZ         | 5        | 103°42'10"             | 33°53'29"             | 3008         | Zhang & Zhang19007            |
| MS    | ZQ         | 5        | 104°5'28"              | 33°42'13"             | 2758         | Zhang & Zhang19008            |
|       | EM         | 5        | 103°19'48"             | 29°31'55"             | 2702         | Zhang & Zhang19009            |
|       | HLG        | 5        | 101°58'7"              | 29°33'8"              | 3502         | Zhang & Zhang19010            |
|       | MB         | 5        | 102°17'54"             | 31°42'20"             | 3411         | Zhang & Zhang19011            |
| DQ    | WL         | 5        | 102°34'23"             | 30°30'14"             | 3076         | Zhang & Zhang19012            |
|       | CQ         |          | 107°33'29"             | 33°13'21"             |              |                               |
|       | TJH        |          | 104°46'3"              | 32°35'15"             |              |                               |
|       | SGN        |          | 102°49'7"              | 31°2'6"               |              |                               |
