# Supplementary material for: Population Genomic Analyses Suggest a Hybrid Origin, Cryptic Sexuality, and Decay of Genes Regulating Seed Development for the Putatively Strictly Asexual Kingdonia uniflora (Circaeasteraceae, Ranunculales)
Source: MDPI journal article supplement (doi:10.3390/ijms24021451), 2023-01-11
Supplement: s1 [file s1]

```

1  #!/bin/bash
2  list=PathToSampleList/list.txt
3  ref=PathToGenomeReference/KingdoniaUniflora_genome_scaffolds_V1.0.fasta
4  GATK=PathToGatk/gatk
5  vcf=PathToSnp/all.merged.snp.filtered.vcf
6  gffread=PathToGffread/gffread
7  gff=PathToGff/KingdoniaUniflora_genome_scaffolds_V1.0.gff
8  Genelist=PathToGenelist/Genelist
9
10 for ((i=1; i<=60; i++))
11 do
12     echo $i;
13     sample=$(tail -n +$i $list | head -1 | cut -f 1)
14     j=`expr $i + 9`
15     cat $vcf | cut -f 1,2,3,4,5,6,7,8,9,$j >snp.filtered.$sample.vcf
16     cat snp.filtered.$sample.vcf | grep ^# >snp.filtered.$sample.head
17     cat snp.filtered.$sample.vcf | grep -E '1/1|2/2' >snp.filtered.$sample.homo
18     cat snp.filtered.$sample.head snp.filtered.$sample.homo >
19     snp.filtered.$sample.homo.vcf
20     $GATK IndexFeatureFile -I snp.filtered.$sample.homo.vcf 2>$sample.index.log&
21     $GATK FastaAlternateReferenceMaker -R $ref -O $sample.remapped.fasta -V
22     snp.filtered.$sample.homo.vcf 2>$sample.log &
23     perl RenameGenomeChr.pl $sample.remapped.fasta $sample.remapped.rename.fasta &
24     $gffread $gff -g $sample.remapped.rename.fasta -x
25     $sample.remapped.rename.cds.fasta -y $sample.remapped.rename.pro.fasta
26     2>$sample.index.log &
27     perl MutiToOne.pl $sample.remapped.rename.pro.fasta
28     $sample.remapped.rename.pro.online.fasta
29     perl MutiToOne1.pl $sample.remapped.rename.pro.online.fasta
30     $sample.remapped.rename.pro.online.ok.fasta
31     sed -i '1d' $sample.remapped.rename.pro.online.ok.fasta
32     perl MutiToOne.pl $sample.remapped.rename.cds.fasta
33     $sample.remapped.rename.cds.online.fasta
34     perl MutiToOne1.pl $sample.remapped.rename.cds.online.fasta
35     $sample.remapped.rename.cds.online.ok.fasta
36     sed -i '1d' $sample.remapped.rename.cds.online.ok.fasta
37     perl GetKingSeq.pl $Genelist $sample.remapped.rename.cds.online.ok.fasta
38     Gene.$sample.cds.fasta
39     perl GetKingSeq.pl $Genelist $sample.remapped.rename.pro.online.ok.fasta
40     Gene.$sample.pro.fasta
41 done

```
