# Supplementary material for: Population Genomic Analyses Suggest a Hybrid Origin, Cryptic Sexuality, and Decay of Genes Regulating Seed Development for the Putatively Strictly Asexual Kingdonia uniflora (Circaeasteraceae, Ranunculales)
Source: MDPI journal article supplement (doi:10.3390/ijms24021451), 2023-01-11
Supplement: s1 [file s1]

```

1  #!/usr/bin/perl
2  # use strict;
3  open(FLO, "$ARGV[0]") || die ;
4  open (OUT1, ">$ARGV[1]") || die ;
5  @list =<FLO>;
6  chomp @list;
7  foreach $i (@list){
8      print $i, "\n";
9      open $fh, "snp2.".$i.".cds.fasta";
10 #   open $fh1, ">", "snp2.".$i.".cds.re.fasta";
11   while (<$fh){
12       chomp;
13       if ($_ =~ /\^\>/){
14           print OUT1 $_."+".$i, "\n";
15 #       print OUT1 ">".$i, "\n";
16       }
17       else {
18 #       $_ = substr ($_, 0, length ($_)-3);
19       print OUT1 $_, "\n";}
20   }
21 }
22

```
