# Supplementary material for: Population Genomic Analyses Suggest a Hybrid Origin, Cryptic Sexuality, and Decay of Genes Regulating Seed Development for the Putatively Strictly Asexual Kingdonia uniflora (Circaeasteraceae, Ranunculales)
Source: MDPI journal article supplement (doi:10.3390/ijms24021451), 2023-01-11
Supplement: s1 [file s1]

Supplemental Table S2. Information of contigs containing SNPs.

| Contig                | Length | No. of genes |
|-----------------------|--------|--------------|
| Contig2655 ref0000096 | 35620  | 0            |
| Contig1938 ref0000500 | 17953  | 0            |
| Contig2702 ref0000539 | 70525  | 0            |
| Contig2109 ref0001040 | 16744  | 0            |
| Contig743 ref0001070  | 28563  | 0            |
| Contig459 ref0001171  | 47723  | 0            |
| Contig906 ref0001547  | 31211  | 0            |
| Contig241 ref0001784  | 20428  | 0            |
| Contig2187 ref0002270 | 69956  | 0            |
| Contig838 ref0002343  | 72870  | 0            |
| Contig2460 ref0002513 | 91273  | 0            |
| Contig1887 ref0002835 | 127470 | 0            |
| Contig996 ref0002853  | 15754  | 0            |
| Contig2091 ref0000088 | 28543  | 0            |
| Contig770 ref0000374  | 56529  | 0            |
| Contig1737 ref0000925 | 45667  | 0            |
| Contig2102 ref0001035 | 39074  | 0            |
| Contig1698 ref0001107 | 19337  | 0            |
| Contig131 ref0001290  | 7026   | 0            |
| Contig37 ref0001686   | 220100 | 0            |
| Contig118 ref0001741  | 30237  | 0            |
| Contig482 ref0001827  | 35257  | 0            |
| Contig1471 ref0001907 | 39391  | 0            |
| Contig2188 ref0002262 | 28275  | 0            |
| Contig637 ref0002356  | 21234  | 0            |
| Contig1759 ref0001362 | 65423  | 0            |
| Contig1532 ref0002508 | 59457  | 0            |
| Contig2479 ref0000139 | 36677  | 0            |
| Contig1043 ref0002899 | 27378  | 0            |
| Contig2121 ref0001195 | 54188  | 0            |
| Contig903 ref0001552  | 28090  | 0            |
| Contig569 ref0000249  | 52950  | 0            |
| Contig525 ref0002401  | 54296  | 0            |
| Contig1788 ref0001597 | 97031  | 0            |
| Contig2369 ref0001924 | 177591 | 0            |
| Contig1997 ref0000608 | 55619  | 0            |
| Contig2887 ref0002273 | 56210  | 0            |
| Contig2391 ref0002841 | 17145  | 1            |
| Contig154 ref0000862  | 182471 | 0            |
| Contig1512 ref0002747 | 84085  | 0            |
| Contig2458 ref0000585 | 84371  | 0            |
| Contig2304 ref0001488 | 36070  | 1            |
| Contig2196 ref0002087 | 27921  | 0            |
| Contig2237 ref0002290 | 15017  | 0            |
| Contig375 ref0002916  | 146824 | 0            |
| Contig2041 ref0000338 | 13207  | 0            |
| Contig210 ref0001117  | 58597  | 0            |
| Contig1156 ref0002135 | 45543  | 0            |
| Contig2614 ref0001013 | 17381  | 0            |

|                       |        |   |
|-----------------------|--------|---|
| Contig729 ref0002668  | 206837 | 0 |
| Contig2880 ref0000148 | 16385  | 0 |
| Contig2026 ref0000807 | 12076  | 0 |
| Contig2302 ref0001482 | 45444  | 0 |
| Contig2582 ref0001009 | 287578 | 1 |
| Contig1704 ref0000256 | 16045  | 1 |
| Contig2672 ref0000566 | 97542  | 0 |
| Contig1467 ref0000019 | 116410 | 0 |
| Contig1958 ref0001860 | 23490  | 0 |
| Contig557 ref0000466  | 38093  | 0 |
| Contig897 ref0000657  | 32673  | 0 |
| Contig2906 ref0000767 | 40284  | 0 |
| Contig1866 ref0000006 | 34055  | 0 |
| Contig234 ref0002512  | 17156  | 0 |
| Contig43 ref0000134   | 36065  | 0 |
| Contig2280 ref0000363 | 40362  | 2 |
| Contig1649 ref0000901 | 49468  | 0 |
| Contig1481 ref0001194 | 172721 | 3 |
| Contig141 ref0001064  | 31240  | 0 |
| Contig2434 ref0001889 | 113446 | 0 |
| Contig2378 ref0001712 | 17336  | 0 |
| Contig2885 ref0001855 | 29094  | 2 |
| Contig2090 ref0000089 | 52968  | 0 |
| Contig1749 ref0001132 | 30367  | 0 |
| Contig25 ref0001478   | 17330  | 0 |
| Contig2361 ref0001920 | 44008  | 0 |
| Contig1181 ref0002378 | 38746  | 0 |
| Contig331 ref0000884  | 31856  | 0 |
| Contig2789 ref0001906 | 28454  | 4 |
| Contig253 ref0001983  | 33454  | 0 |
| Contig1027 ref0001294 | 22472  | 0 |
| Contig1522 ref0002339 | 21133  | 0 |
| Contig534 ref0002211  | 27184  | 0 |
| Contig399 ref0001183  | 28468  | 2 |
| Contig2771 ref0002074 | 24844  | 0 |
| Contig2882 ref0002260 | 33906  | 1 |
| Contig418 ref0000281  | 38323  | 0 |
| Contig504 ref0002752  | 29838  | 0 |
| Contig1048 ref0002906 | 42946  | 0 |
| Contig2679 ref0000562 | 28019  | 1 |
| Contig2804 ref0001670 | 94038  | 0 |
| Contig1035 ref0000079 | 46499  | 0 |
| Contig1670 ref0000220 | 34025  | 0 |
| Contig499 ref0002006  | 39149  | 0 |
| Contig1004 ref0000868 | 36861  | 1 |
| Contig1356 ref0000974 | 38073  | 0 |
| Contig1723 ref0000988 | 274383 | 2 |
| Contig100 ref0001941  | 41061  | 0 |
| Contig1184 ref0002373 | 39673  | 0 |
| Contig1957 ref0001642 | 31129  | 0 |
| Contig2160 ref0002247 | 34128  | 0 |

|                       |        |   |
|-----------------------|--------|---|
| Contig1445 ref0002568 | 44377  | 0 |
| Contig798 ref0000471  | 220548 | 4 |
| Contig204 ref0000914  | 51126  | 0 |
| Contig2154 ref0000347 | 56888  | 0 |
| Contig864 ref0001315  | 21248  | 0 |
| Contig1621 ref0001196 | 49386  | 1 |
| Contig1763 ref0001579 | 171663 | 0 |
| Contig1837 ref0001856 | 37896  | 0 |
| Contig2463 ref0002511 | 46717  | 0 |
| Contig1346 ref0000752 | 35719  | 5 |
| Contig1330 ref0002201 | 140481 | 2 |
| Contig2795 ref0001700 | 36645  | 1 |
| Contig1577 ref0001808 | 44187  | 1 |
| Contig2062 ref0002827 | 139667 | 0 |
| Contig1256 ref0000260 | 40995  | 0 |
| Contig2446 ref0000349 | 27664  | 0 |
| Contig17 ref0001245   | 24281  | 0 |
| Contig2576 ref0001724 | 29563  | 5 |
| Contig2860 ref0001871 | 83856  | 3 |
| Contig983 ref0000147  | 49458  | 0 |
| Contig552 ref0000463  | 24358  | 1 |
| Contig1933 ref0000504 | 27167  | 2 |
| Contig336 ref0000887  | 44884  | 0 |
| Contig2597 ref0001492 | 44124  | 1 |
| Contig2471 ref0000127 | 54990  | 0 |
| Contig1977 ref0001386 | 28533  | 0 |
| Contig26 ref0001475   | 41091  | 0 |
| Contig2695 ref0002229 | 50467  | 1 |
| Contig2769 ref0002258 | 58586  | 0 |
| Contig2751 ref0002432 | 43360  | 1 |
| Contig899 ref0000655  | 36804  | 0 |
| Contig1898 ref0002582 | 38297  | 0 |
| Contig2781 ref0001914 | 37546  | 0 |
| Contig508 ref0002756  | 50657  | 1 |
| Contig876 ref0001524  | 61236  | 1 |
| Contig221 ref0002553  | 39572  | 1 |
| Contig796 ref0000485  | 36142  | 1 |
| Contig260 ref0001355  | 47626  | 3 |
| Contig2916 ref0000526 | 72878  | 2 |
| Contig901 ref0002777  | 89342  | 2 |
| Contig170 ref0000388  | 36533  | 1 |
| Contig164 ref0000607  | 53566  | 0 |
| Contig2020 ref0000813 | 65996  | 2 |
| Contig289 ref0002485  | 61469  | 0 |
| Contig2095 ref0000084 | 75282  | 0 |
| Contig913 ref0001332  | 79920  | 0 |
| Contig908 ref0001542  | 55673  | 1 |
| Contig672 ref0001620  | 53171  | 4 |
| Contig2642 ref0002813 | 33247  | 1 |
| Contig2858 ref0000991 | 53414  | 1 |
| Contig2077 ref0000110 | 72002  | 7 |

|                       |        |    |
|-----------------------|--------|----|
| Contig2284 ref0000367 | 134180 | 2  |
| Contig2910 ref0000524 | 65976  | 0  |
| Contig1410 ref0001660 | 17645  | 0  |
| Contig1925 ref0000277 | 46815  | 2  |
| Contig484 ref0001829  | 41778  | 0  |
| Contig628 ref0002199  | 196958 | 1  |
| Contig2612 ref0001019 | 91854  | 4  |
| Contig861 ref0001318  | 52404  | 0  |
| Contig2636 ref0001448 | 48621  | 0  |
| Contig721 ref0001544  | 60558  | 0  |
| Contig248 ref0001781  | 118940 | 0  |
| Contig954 ref0000382  | 95136  | 0  |
| Contig1910 ref0000943 | 77313  | 0  |
| Contig1853 ref0002384 | 56326  | 0  |
| Contig2398 ref0002844 | 56279  | 4  |
| Contig2207 ref0001743 | 487064 | 4  |
| Contig1145 ref0001969 | 86111  | 0  |
| Contig1162 ref0001536 | 81305  | 2  |
| Contig1062 ref0002312 | 49561  | 10 |
| Contig1968 ref0001160 | 81629  | 0  |
| Contig1953 ref0001650 | 84824  | 0  |
| Contig2195 ref0002090 | 40758  | 0  |
| Contig2867 ref0002623 | 75995  | 0  |
| Contig2406 ref0002467 | 44417  | 0  |
| Contig1948 ref0001653 | 200078 | 0  |
| Contig2225 ref0002111 | 257088 | 0  |
| Contig2236 ref0002291 | 97044  | 0  |
| Contig187 ref0000178  | 118032 | 9  |
| Contig891 ref0000663  | 71854  | 7  |
| Contig1794 ref0001821 | 77532  | 0  |
| Contig49 ref0000124   | 67576  | 0  |
| Contig46 ref0000137   | 63861  | 3  |
| Contig2754 ref0002427 | 71466  | 0  |
| Contig370 ref0002921  | 62583  | 0  |
| Contig733 ref0002491  | 92461  | 5  |
| Contig1903 ref0000731 | 76262  | 5  |
| Contig1194 ref0002538 | 93105  | 1  |
| Contig828 ref0002909  | 71711  | 8  |
| Contig2319 ref0001259 | 59038  | 0  |
| Contig481 ref0001824  | 52394  | 2  |
| Contig1974 ref0001385 | 78981  | 0  |
| Contig1780 ref0001602 | 82439  | 2  |
| Contig1436 ref0002037 | 57391  | 0  |
| Contig2411 ref0002648 | 120270 | 2  |
| Contig2448 ref0000341 | 119587 | 0  |
| Contig2785 ref0001910 | 59212  | 1  |
| Contig1094 ref0001986 | 75685  | 2  |
| Contig2856 ref0000997 | 96402  | 7  |
| Contig1342 ref0000748 | 100136 | 5  |
| Contig352 ref0002523  | 108649 | 0  |
| Contig3 ref0000573    | 82060  | 0  |

|                       |        |    |
|-----------------------|--------|----|
| Contig1614 ref0001793 | 44626  | 0  |
| Contig717 ref0002153  | 114425 | 2  |
| Contig1518 ref0002908 | 111237 | 9  |
| Contig1549 ref0001993 | 112722 | 0  |
| Contig2269 ref0002859 | 116055 | 0  |
| Contig150 ref0000866  | 131530 | 0  |
| Contig389 ref0002346  | 594329 | 5  |
| Contig2841 ref0000777 | 88705  | 3  |
| Contig2508 ref0001718 | 65526  | 0  |
| Contig844 ref0002029  | 121547 | 0  |
| Contig1601 ref0002926 | 100605 | 8  |
| Contig2565 ref0001933 | 53286  | 4  |
| Contig1459 ref0002413 | 64344  | 1  |
| Contig1235 ref0000712 | 77294  | 9  |
| Contig1905 ref0000725 | 83334  | 0  |
| Contig1344 ref0000754 | 80422  | 1  |
| Contig2432 ref0001885 | 93062  | 0  |
| Contig2772 ref0002071 | 110825 | 0  |
| Contig137 ref0001288  | 95566  | 0  |
| Contig2675 ref0000571 | 87497  | 0  |
| Contig1932 ref0002639 | 81370  | 12 |
| Contig851 ref0001090  | 60179  | 3  |
| Contig2316 ref0001263 | 92636  | 0  |
| Contig1973 ref0001390 | 102162 | 4  |
| Contig1842 ref0002548 | 91432  | 3  |
| Contig1513 ref0002746 | 98034  | 0  |
| Contig1107 ref0001099 | 101129 | 0  |
| Contig1371 ref0001420 | 141171 | 3  |
| Contig1918 ref0000949 | 77517  | 0  |
| Contig2759 ref0002436 | 135885 | 0  |
| Contig2609 ref0000798 | 110208 | 8  |
| Contig627 ref0002188  | 110109 | 3  |
| Contig2346 ref0002304 | 128989 | 0  |
| Contig612 ref0002715  | 80387  | 8  |
| Contig2111 ref0001694 | 105049 | 0  |
| Contig98 ref0002779   | 126779 | 4  |
| Contig1216 ref0001139 | 123531 | 5  |
| Contig1966 ref0001152 | 89273  | 7  |
| Contig2451 ref0000592 | 116400 | 0  |
| Contig1899 ref0002584 | 119263 | 7  |
| Contig196 ref0002894  | 118301 | 11 |
| Contig2483 ref0001242 | 99777  | 0  |
| Contig730 ref0002494  | 99250  | 0  |
| Contig143 ref0001066  | 92431  | 2  |
| Contig1014 ref0000648 | 132836 | 7  |
| Contig1109 ref0001105 | 143140 | 5  |
| Contig2686 ref0002051 | 123830 | 5  |
| Contig739 ref0002495  | 104027 | 0  |
| Contig517 ref0002560  | 126198 | 5  |
| Contig1047 ref0002903 | 149856 | 6  |
| Contig1294 ref0002682 | 126126 | 5  |

|            |            |        |    |
|------------|------------|--------|----|
| Contig2079 | ref0000102 | 133231 | 0  |
| Contig2305 | ref0001487 | 138494 | 0  |
| Contig2278 | ref0000152 | 102839 | 7  |
| Contig1042 | ref0002900 | 93020  | 0  |
| Contig1242 | ref0000487 | 97294  | 2  |
| Contig801  | ref0001759 | 138870 | 4  |
| Contig1646 | ref0002044 | 145998 | 0  |
| Contig378  | ref0002913 | 90893  | 1  |
| Contig2098 | ref0000091 | 128192 | 2  |
| Contig857  | ref0001092 | 146595 | 0  |
| Contig1528 | ref0002333 | 150001 | 5  |
| Contig379  | ref0002912 | 127077 | 0  |
| Contig2762 | ref0002253 | 123939 | 0  |
| Contig528  | ref0002392 | 126364 | 0  |
| Contig2073 | ref0000106 | 133927 | 0  |
| Contig687  | ref0001308 | 132611 | 7  |
| Contig1550 | ref0002162 | 189919 | 0  |
| Contig2309 | ref0001489 | 81796  | 0  |
| Contig309  | ref0000674 | 131787 | 2  |
| Contig360  | ref0000195 | 99298  | 7  |
| Contig1130 | ref0000892 | 117475 | 5  |
| Contig2862 | ref0001869 | 149110 | 8  |
| Contig419  | ref0000282 | 119499 | 3  |
| Contig14   | ref0001248 | 135862 | 0  |
| Contig1553 | ref0002159 | 136071 | 1  |
| Contig2815 | ref0001875 | 162802 | 7  |
| Contig2314 | ref0001261 | 119424 | 0  |
| Contig670  | ref0001622 | 184323 | 9  |
| Contig882  | ref0000413 | 122858 | 0  |
| Contig1370 | ref0001421 | 123966 | 2  |
| Contig2019 | ref0001495 | 166016 | 12 |
| Contig1221 | ref0000933 | 180088 | 2  |
| Contig1026 | ref0001295 | 121070 | 11 |
| Contig450  | ref0001168 | 458780 | 5  |
| Contig2826 | ref0001201 | 135192 | 0  |
| Contig2038 | ref0001029 | 168491 | 11 |
| Contig920  | ref0001061 | 150333 | 11 |
| Contig1976 | ref0001387 | 193243 | 0  |
| Contig1347 | ref0000753 | 162519 | 0  |
| Contig1686 | ref0001345 | 94678  | 9  |
| Contig59   | ref0000351 | 171855 | 11 |
| Contig993  | ref0002848 | 268273 | 0  |
| Contig368  | ref0000203 | 183478 | 28 |
| Contig394  | ref0000842 | 213794 | 6  |
| Contig1009 | ref0001909 | 178547 | 0  |
| Contig2827 | ref0001202 | 215167 | 4  |
| Contig1792 | ref0001819 | 171555 | 5  |
| Contig2849 | ref0000781 | 134715 | 6  |
| Contig2546 | ref0000606 | 144327 | 0  |
| Contig1091 | ref0001991 | 134941 | 0  |
| Contig497  | ref0002002 | 187907 | 0  |

|                       |        |    |
|-----------------------|--------|----|
| Contig995 ref0002854  | 188979 | 0  |
| Contig2696 ref0002232 | 188313 | 5  |
| Contig2520 ref0002635 | 196668 | 0  |
| Contig270 ref0001570  | 154017 | 2  |
| Contig2264 ref0002864 | 163882 | 5  |
| Contig1217 ref0001140 | 207781 | 0  |
| Contig31 ref0001688   | 145883 | 0  |
| Contig2756 ref0002429 | 195574 | 3  |
| Contig764 ref0000551  | 207961 | 0  |
| Contig1716 ref0002601 | 178697 | 0  |
| Contig965 ref0001081  | 222383 | 3  |
| Contig2550 ref0002583 | 185171 | 11 |
| Contig2510 ref0002103 | 210019 | 6  |
| Contig1337 ref0002194 | 203427 | 5  |
| Contig2409 ref0002464 | 136575 | 0  |
| Contig1421 ref0002216 | 220527 | 0  |
| Contig2323 ref0001046 | 171618 | 0  |
| Contig1046 ref0002904 | 200230 | 0  |
| Contig1504 ref0001645 | 208304 | 7  |
| Contig602 ref0002521  | 165135 | 0  |
| Contig2681 ref0002058 | 177626 | 0  |
| Contig799 ref0000470  | 223350 | 0  |
| Contig1003 ref0001932 | 210734 | 16 |
| Contig285 ref0002479  | 197865 | 0  |
| Contig2796 ref0001701 | 186015 | 11 |
| Contig435 ref0000739  | 209063 | 15 |
| Contig2524 ref0002631 | 160112 | 4  |
| Contig1297 ref0002685 | 229512 | 7  |
| Contig594 ref0001719  | 219701 | 10 |
| Contig2515 ref0002100 | 227847 | 0  |
| Contig94 ref0002783   | 235759 | 12 |
| Contig300 ref0000671  | 175566 | 0  |
| Contig2375 ref0001706 | 272968 | 11 |
| Contig2656 ref0000099 | 204960 | 0  |
| Contig2266 ref0002866 | 344252 | 0  |
| Contig1070 ref0000187 | 247422 | 7  |
| Contig1017 ref0000647 | 203339 | 15 |
| Contig2517 ref0002098 | 222248 | 8  |
| Contig1669 ref0000432 | 227694 | 17 |
| Contig2619 ref0001010 | 192866 | 20 |
| Contig1310 ref0001850 | 235032 | 0  |
| Contig2562 ref0001928 | 231048 | 0  |
| Contig2099 ref0000090 | 233788 | 9  |
| Contig1401 ref0001861 | 240285 | 11 |
| Contig669 ref0001407  | 234735 | 25 |
| Contig477 ref0001613  | 248119 | 14 |
| Contig745 ref0001058  | 189916 | 0  |
| Contig2835 ref0001434 | 247676 | 12 |
| Contig282 ref0002482  | 206902 | 23 |
| Contig1525 ref0002338 | 231911 | 5  |
| Contig561 ref0000245  | 216783 | 0  |

|                       |        |    |
|-----------------------|--------|----|
| Contig2056 ref0000280 | 223374 | 24 |
| Contig856 ref0001091  | 222324 | 14 |
| Contig2525 ref0002630 | 233194 | 19 |
| Contig407 ref0000053  | 207382 | 20 |
| Contig56 ref0000358   | 212697 | 14 |
| Contig2055 ref0000283 | 258357 | 0  |
| Contig2775 ref0002078 | 274451 | 0  |
| Contig1828 ref0000966 | 236207 | 0  |
| Contig426 ref0000513  | 304088 | 11 |
| Contig1446 ref0002571 | 248633 | 7  |
| Contig598 ref0001361  | 264153 | 0  |
| Contig242 ref0001783  | 268624 | 8  |
| Contig18 ref0001256   | 292588 | 3  |
| Contig1316 ref0001848 | 322731 | 0  |
| Contig1096 ref0001984 | 258558 | 11 |
| Contig400 ref0000048  | 281473 | 0  |
| Contig2311 ref0001266 | 289466 | 9  |
| Contig653 ref0002010  | 281969 | 0  |
| Contig384 ref0002349  | 320480 | 18 |
| Contig575 ref0000011  | 286237 | 36 |
| Contig680 ref0001307  | 289547 | 35 |
| Contig2214 ref0002184 | 346351 | 0  |
| Contig1805 ref0000445 | 266918 | 9  |
| Contig1237 ref0000710 | 297576 | 8  |
| Contig2742 ref0002616 | 634732 | 10 |
| Contig73 ref0000820   | 292321 | 0  |
| Contig1382 ref0000207 | 293801 | 10 |
| Contig2248 ref0002456 | 410313 | 0  |
| Contig1222 ref0000936 | 360102 | 0  |
| Contig1045 ref0002901 | 319395 | 26 |
| Contig2045 ref0000334 | 296382 | 0  |
| Contig2726 ref0000552 | 273585 | 7  |
| Contig1591 ref0001382 | 292754 | 43 |
| Contig2602 ref0000803 | 312198 | 0  |
| Contig1163 ref0001537 | 362360 | 9  |
| Contig2063 ref0002828 | 290068 | 21 |
| Contig223 ref0002555  | 274434 | 0  |
| Contig716 ref0002154  | 331901 | 0  |
| Contig1881 ref0001039 | 527983 | 13 |
| Contig2540 ref0002519 | 360094 | 7  |
| Contig107 ref0001940  | 270540 | 0  |
| Contig639 ref0002364  | 291878 | 0  |
| Contig895 ref0000659  | 332323 | 15 |
| Contig1841 ref0002545 | 376366 | 0  |
| Contig2596 ref0000788 | 287010 | 0  |
| Contig2902 ref0000763 | 341986 | 19 |
| Contig727 ref0001573  | 359545 | 20 |
| Contig1517 ref0002733 | 354271 | 0  |
| Contig2250 ref0002641 | 355888 | 0  |
| Contig546 ref0000693  | 339844 | 15 |
| Contig2869 ref0000318 | 337243 | 16 |



|                       |        |    |
|-----------------------|--------|----|
| Contig2666 ref0000323 | 392325 | 14 |
| Contig507 ref0002755  | 392596 | 0  |
| Contig172 ref0002300  | 395782 | 11 |
| Contig1029 ref0001302 | 298599 | 0  |
| Contig2000 ref0001276 | 313176 | 0  |
| Contig2691 ref0002233 | 295153 | 21 |
| Contig2922 ref0001186 | 358744 | 0  |
| Contig2534 ref0002444 | 353374 | 0  |
| Contig1249 ref0000496 | 401312 | 0  |
| Contig1660 ref0000439 | 362277 | 21 |
| Contig1539 ref0002498 | 343443 | 0  |
| Contig2058 ref0000294 | 437319 | 0  |
| Contig4 ref0000580    | 422092 | 8  |
| Contig1870 ref0002741 | 372961 | 0  |
| Contig591 ref0002826  | 300633 | 0  |
| Contig2545 ref0002529 | 437305 | 0  |
| Contig1279 ref0002765 | 362703 | 8  |
| Contig529 ref0002393  | 413702 | 28 |
| Contig1616 ref0002719 | 682830 | 9  |
| Contig1276 ref0002770 | 423432 | 13 |
| Contig985 ref0000141  | 372505 | 0  |
| Contig588 ref0001553  | 342936 | 9  |
| Contig2440 ref0000343 | 374313 | 0  |
| Contig658 ref0002585  | 443559 | 0  |
| Contig619 ref0002708  | 354571 | 0  |
| Contig2719 ref0000316 | 366459 | 11 |
| Contig976 ref0002880  | 374395 | 0  |
| Contig1243 ref0000486 | 453330 | 15 |
| Contig1350 ref0000968 | 382136 | 27 |
| Contig2351 ref0002127 | 416979 | 7  |
| Contig700 ref0002323  | 439478 | 0  |
| Contig246 ref0001787  | 396098 | 47 |
| Contig2799 ref0001693 | 403212 | 21 |
| Contig585 ref0001561  | 354050 | 0  |
| Contig1413 ref0001659 | 439833 | 24 |
| Contig2897 ref0000546 | 471288 | 26 |
| Contig738 ref0002496  | 443817 | 22 |
| Contig293 ref0002728  | 401264 | 0  |
| Contig2521 ref0002634 | 469696 | 13 |
| Contig1136 ref0000898 | 438321 | 7  |
| Contig186 ref0000177  | 384139 | 15 |
| Contig1121 ref0000678 | 580343 | 0  |
| Contig2438 ref0002299 | 423026 | 19 |
| Contig659 ref0002586  | 409442 | 66 |
| Contig299 ref0002718  | 370004 | 0  |
| Contig1740 ref0000461 | 493363 | 28 |
| Contig1795 ref0001820 | 469206 | 0  |
| Contig1393 ref0000430 | 483741 | 0  |
| Contig462 ref0001400  | 532057 | 24 |
| Contig568 ref0000248  | 409724 | 18 |
| Contig103 ref0001944  | 441820 | 0  |

|                       |         |    |
|-----------------------|---------|----|
| Contig621 ref0002190  | 488670  | 0  |
| Contig794 ref0000483  | 486919  | 25 |
| Contig1565 ref0001593 | 563644  | 16 |
| Contig1648 ref0000902 | 475981  | 0  |
| Contig1748 ref0001131 | 531222  | 0  |
| Contig2847 ref0000775 | 421986  | 0  |
| Contig398 ref0000830  | 492809  | 28 |
| Contig514 ref0002563  | 470309  | 15 |
| Contig1661 ref0000438 | 513173  | 24 |
| Contig1303 ref0001633 | 417459  | 16 |
| Contig714 ref0002152  | 570306  | 27 |
| Contig566 ref0000238  | 568097  | 40 |
| Contig2676 ref0000570 | 532532  | 38 |
| Contig7 ref0000577    | 619872  | 0  |
| Contig866 ref0001313  | 431790  | 0  |
| Contig2552 ref0001395 | 506715  | 0  |
| Contig2317 ref0001264 | 478080  | 0  |
| Contig1721 ref0000986 | 539176  | 22 |
| Contig521 ref0002397  | 525939  | 0  |
| Contig1676 ref0000214 | 560633  | 15 |
| Contig24 ref0001477   | 538882  | 25 |
| Contig11 ref0001251   | 498529  | 21 |
| Contig324 ref0000222  | 571538  | 0  |
| Contig1168 ref0001530 | 569921  | 18 |
| Contig2421 ref0000537 | 534320  | 0  |
| Contig825 ref0002181  | 678577  | 0  |
| Contig533 ref0002208  | 952946  | 0  |
| Contig666 ref0001417  | 489744  | 0  |
| Contig1673 ref0000219 | 443943  | 53 |
| Contig2539 ref0002439 | 602135  | 0  |
| Contig1523 ref0002340 | 640301  | 29 |
| Contig96 ref0002781   | 461406  | 11 |
| Contig1717 ref0002600 | 691766  | 0  |
| Contig1106 ref0001098 | 753018  | 0  |
| Contig2116 ref0001696 | 655136  | 42 |
| Contig579 ref0000023  | 628683  | 0  |
| Contig1783 ref0001601 | 593657  | 21 |
| Contig1254 ref0000258 | 684189  | 0  |
| Contig55 ref0000359   | 569696  | 56 |
| Contig2404 ref0002465 | 628743  | 0  |
| Contig1488 ref0001277 | 281122  | 13 |
| Contig1117 ref0001326 | 89330   | 0  |
| Contig1383 ref0000208 | 687451  | 21 |
| Contig2779 ref0002080 | 1289429 | 0  |
| Contig1992 ref0000292 | 573517  | 24 |
| Contig923 ref0001060  | 578713  | 36 |
| Contig2593 ref0000793 | 584220  | 32 |
| Contig354 ref0002525  | 557421  | 0  |
| Contig147 ref0000062  | 520453  | 52 |
| Contig10 ref0001252   | 960239  | 0  |
| Contig1313 ref0001851 | 738950  | 25 |

|                       |        |    |
|-----------------------|--------|----|
| Contig1768 ref0001584 | 713041 | 0  |
| Contig1988 ref0002410 | 701036 | 0  |
| Contig1476 ref0002762 | 699924 | 0  |
| Contig559 ref0000459  | 664744 | 28 |
| Contig1023 ref0001298 | 653095 | 0  |
| Contig1282 ref0002886 | 582485 | 43 |
| Contig2888 ref0002788 | 658626 | 0  |
| Contig981 ref0000145  | 564360 | 72 |
| Contig696 ref0002658  | 584172 | 0  |
| Contig1624 ref0000498 | 611637 | 53 |
| Contig1190 ref0002534 | 626166 | 26 |
| Contig1896 ref0000112 | 634898 | 0  |
| Contig1566 ref0001590 | 749612 | 0  |
| Contig1278 ref0002764 | 963295 | 0  |
| Contig2190 ref0002085 | 665650 | 47 |
| Contig1423 ref0002214 | 678198 | 40 |
| Contig2029 ref0000816 | 797656 | 19 |
| Contig1128 ref0000685 | 670964 | 0  |
| Contig1116 ref0001327 | 642490 | 47 |
| Contig515 ref0002562  | 759949 | 17 |
| Contig968 ref0000161  | 744377 | 0  |
| Contig1779 ref0001800 | 713764 | 42 |
| Contig153 ref0000863  | 700964 | 0  |
| Contig1540 ref0002466 | 823775 | 29 |
| Contig372 ref0002919  | 663938 | 17 |
| Contig237 ref0000928  | 682496 | 26 |
| Contig1724 ref0000980 | 607841 | 40 |
| Contig2784 ref0001911 | 761734 | 0  |
| Contig2893 ref0000554 | 795639 | 23 |
| Contig1851 ref0002386 | 757475 | 0  |
| Contig999 ref0002856  | 580138 | 0  |
| Contig1767 ref0001583 | 673859 | 29 |
| Contig91 ref0002786   | 654745 | 0  |
| Contig320 ref0000233  | 753006 | 48 |
| Contig23 ref0001472   | 861454 | 0  |
| Contig1756 ref0000057 | 776932 | 58 |
| Contig1703 ref0000251 | 946148 | 28 |
| Contig551 ref0000464  | 761072 | 0  |
| Contig1133 ref0000893 | 566096 | 14 |
| Contig180 ref0000179  | 755368 | 39 |
| Contig725 ref0002675  | 668376 | 0  |
| Contig2171 ref0002062 | 743835 | 0  |
| Contig1900 ref0000728 | 749681 | 44 |
| Contig1480 ref0001197 | 848836 | 21 |
| Contig461 ref0001401  | 800665 | 33 |
| Contig2143 ref0001903 | 700063 | 0  |
| Contig655 ref0002012  | 762714 | 0  |
| Contig2006 ref0001282 | 959912 | 0  |
| Contig2859 ref0000990 | 757087 | 37 |
| Contig1524 ref0002337 | 781462 | 0  |
| Contig1253 ref0000265 | 759290 | 0  |

|                       |         |    |
|-----------------------|---------|----|
| Contig297 ref0002732  | 828265  | 0  |
| Contig2388 ref0000114 | 960012  | 27 |
| Contig708 ref0002329  | 876291  | 0  |
| Contig144 ref0001067  | 834841  | 0  |
| Contig409 ref0000044  | 1175874 | 34 |
| Contig405 ref0000051  | 833755  | 0  |
| Contig2447 ref0000350 | 738312  | 0  |
| Contig345 ref0001754  | 901023  | 0  |
| Contig2296 ref0000622 | 812066  | 42 |
| Contig1098 ref0001994 | 939002  | 36 |
| Contig707 ref0002326  | 853370  | 0  |
| Contig288 ref0002486  | 745673  | 85 |
| Contig2141 ref0001901 | 884582  | 0  |
| Contig2709 ref0000544 | 776533  | 0  |
| Contig2745 ref0002621 | 953362  | 0  |
| Contig2553 ref0001446 | 907056  | 0  |
| Contig363 ref0000198  | 787169  | 40 |
| Contig156 ref0000860  | 884667  | 0  |
| Contig8 ref0000582    | 989830  | 0  |
| Contig2022 ref0000811 | 896688  | 0  |
| Contig2475 ref0000875 | 1090960 | 33 |
| Contig1288 ref0002896 | 859658  | 0  |
| Contig2461 ref0002514 | 957766  | 0  |
| Contig1764 ref0001580 | 814031  | 0  |
| Contig2505 ref0002276 | 1072167 | 35 |
| Contig656 ref0002013  | 1170600 | 0  |
| Contig2724 ref0000072 | 920967  | 0  |
| Contig2594 ref0000790 | 872034  | 41 |
| Contig2101 ref0001032 | 1336507 | 23 |
| Contig791 ref0000478  | 937291  | 0  |
| Contig233 ref0002460  | 1059193 | 0  |
| Contig138 ref0001285  | 980594  | 35 |
| Contig353 ref0002522  | 1029928 | 0  |
| Contig2321 ref0001044 | 814966  | 0  |
| Contig1039 ref0001080 | 928248  | 47 |
| Contig2776 ref0002075 | 958938  | 34 |
| Contig1727 ref0000984 | 904409  | 35 |
| Contig2753 ref0002434 | 1068503 | 24 |
| Contig2259 ref0002644 | 1071688 | 23 |
| Contig119 ref0001740  | 962628  | 64 |
| Contig317 ref0000418  | 932776  | 59 |
| Contig1752 ref0001791 | 1004000 | 0  |
| Contig2765 ref0002254 | 1044429 | 0  |
| Contig1557 ref0002163 | 899880  | 21 |
| Contig667 ref0001416  | 1148550 | 0  |
| Contig1185 ref0002374 | 1019717 | 23 |
| Contig2857 ref0000996 | 1030621 | 34 |
| Contig2263 ref0002863 | 1071004 | 0  |
| Contig614 ref0002709  | 1107397 | 22 |
| Contig340 ref0001749  | 1045082 | 37 |
| Contig1289 ref0002895 | 900470  | 67 |

|                       |         |     |
|-----------------------|---------|-----|
| Contig1722 ref0000987 | 1097259 | 31  |
| Contig2094 ref0000085 | 1148876 | 0   |
| Contig2682 ref0002055 | 976320  | 0   |
| Contig2502 ref0002283 | 1006138 | 0   |
| Contig688 ref0001555  | 1017699 | 53  |
| Contig2925 ref0001191 | 977029  | 0   |
| Contig564 ref0000240  | 1248575 | 0   |
| Contig1454 ref0002404 | 1124757 | 0   |
| Contig1695 ref0001110 | 995586  | 70  |
| Contig1906 ref0000726 | 1019149 | 0   |
| Contig2474 ref0000876 | 1001083 | 0   |
| Contig2347 ref0002303 | 1128405 | 24  |
| Contig243 ref0001782  | 1331197 | 0   |
| Contig1911 ref0000942 | 990629  | 42  |
| Contig683 ref0001304  | 1121475 | 64  |
| Contig1503 ref0001643 | 900019  | 0   |
| Contig305 ref0000668  | 1005443 | 28  |
| Contig2 ref0000574    | 903165  | 0   |
| Contig2506 ref0002279 | 1056106 | 59  |
| Contig2135 ref0001210 | 1225066 | 0   |
| Contig2422 ref0000530 | 1001685 | 69  |
| Contig218 ref0001125  | 1281624 | 54  |
| Contig2002 ref0001278 | 998040  | 113 |
| Contig1199 ref0002541 | 1280407 | 41  |
| Contig971 ref0002873  | 1108179 | 52  |
| Contig932 ref0000856  | 1334729 | 0   |
| Contig1362 ref0001181 | 961086  | 82  |
| Contig310 ref0000421  | 1153947 | 0   |
| Contig1706 ref0001457 | 1319843 | 56  |
| Contig1530 ref0002506 | 1011566 | 0   |
| Contig281 ref0002483  | 1033304 | 54  |
| Contig711 ref0002147  | 1133039 | 51  |
| Contig422 ref0000517  | 1167678 | 40  |
| Contig145 ref0001068  | 1361254 | 31  |
| Contig2728 ref0000533 | 1268195 | 37  |
| Contig1141 ref0001965 | 1121853 | 0   |
| Contig2620 ref0001219 | 1088770 | 61  |
| Contig2128 ref0002391 | 1501347 | 35  |
| Contig973 ref0002875  | 1192929 | 0   |
| Contig609 ref0002517  | 1169792 | 0   |
| Contig892 ref0000660  | 1082485 | 70  |
| Contig850 ref0001089  | 1214705 | 0   |
| Contig597 ref0001350  | 1246895 | 50  |
| Contig1936 ref0000509 | 1113925 | 0   |
| Contig2640 ref0002815 | 1152889 | 59  |
| Contig2417 ref0002650 | 1323992 | 31  |
| Contig1975 ref0001384 | 1197097 | 52  |
| Contig2838 ref0001433 | 1298455 | 0   |
| Contig2848 ref0000780 | 1192064 | 42  |
| Contig2291 ref0000615 | 1243491 | 69  |
| Contig148 ref0000058  | 1399247 | 0   |

|                       |         |     |
|-----------------------|---------|-----|
| Contig2230 ref0001747 | 1272827 | 0   |
| Contig1024 ref0001297 | 1214856 | 0   |
| Contig1608 ref0002923 | 1128027 | 0   |
| Contig2665 ref0000322 | 1413001 | 0   |
| Contig2472 ref0000130 | 1119722 | 0   |
| Contig1963 ref0001157 | 1126084 | 0   |
| Contig1196 ref0002536 | 1336897 | 52  |
| Contig664 ref0001415  | 1223002 | 0   |
| Contig2373 ref0000771 | 1304068 | 0   |
| Contig636 ref0002355  | 1424799 | 0   |
| Contig2783 ref0001912 | 1416940 | 58  |
| Contig1701 ref0000253 | 1428958 | 0   |
| Contig184 ref0000175  | 1120738 | 119 |
| Contig1873 ref0002744 | 1221447 | 92  |
| Contig893 ref0000661  | 1299653 | 69  |
| Contig671 ref0001623  | 1125857 | 80  |
| Contig1158 ref0002143 | 1435643 | 33  |
| Contig1030 ref0001071 | 1468687 | 0   |
| Contig1244 ref0000493 | 1300832 | 28  |
| Contig1969 ref0001161 | 1389901 | 52  |
| Contig685 ref0001310  | 1518582 | 0   |
| Contig2630 ref0001454 | 1054181 | 139 |
| Contig2844 ref0000772 | 1356515 | 0   |
| Contig2504 ref0002277 | 1184942 | 141 |
| Contig2333 ref0000834 | 1117067 | 127 |
| Contig1730 ref0000924 | 1447928 | 79  |
| Contig269 ref0001358  | 1196095 | 111 |
| Contig2096 ref0000083 | 1474436 | 97  |
| Contig2516 ref0002097 | 1428900 | 0   |
| Contig779 ref0002285  | 1448991 | 42  |
| Contig2543 ref0001926 | 1337741 | 102 |
| Contig2298 ref0000624 | 1687851 | 48  |
| Contig160 ref0000640  | 1463581 | 49  |
| Contig2130 ref0001213 | 1674566 | 43  |
| Contig277 ref0001565  | 1570555 | 0   |
| Contig1250 ref0000262 | 1530683 | 71  |
| Contig2023 ref0000812 | 1501876 | 74  |
| Contig2124 ref0002418 | 1336315 | 39  |
| Contig1893 ref0002591 | 1496266 | 0   |
| Contig2831 ref0001438 | 1584694 | 0   |
| Contig2332 ref0000833 | 1189343 | 0   |
| Contig2930 ref0000982 | 1324674 | 76  |
| Contig2300 ref0001484 | 1436243 | 0   |
| Contig1999 ref0002556 | 1501224 | 48  |
| Contig496 ref0002001  | 1642287 | 40  |
| Contig2536 ref0002446 | 1709907 | 36  |
| Contig2134 ref0001209 | 1609672 | 0   |
| Contig2850 ref0000995 | 1620201 | 64  |
| Contig252 ref0001982  | 1456898 | 77  |
| Contig1962 ref0001156 | 1685667 | 0   |
| Contig16 ref0001246   | 1718906 | 0   |

|                       |         |     |
|-----------------------|---------|-----|
| Contig21 ref0001474   | 1500274 | 0   |
| Contig1538 ref0002499 | 1717159 | 0   |
| Contig2356 ref0002132 | 1929256 | 0   |
| Contig2246 ref0002448 | 1697354 | 0   |
| Contig2325 ref0001048 | 1565428 | 92  |
| Contig1320 ref0002015 | 1575664 | 30  |
| Contig1118 ref0001321 | 1723998 | 73  |
| Contig2770 ref0002073 | 1714288 | 70  |
| Contig1298 ref0002686 | 1698800 | 67  |
| Contig613 ref0002716  | 1502663 | 172 |
| Contig2837 ref0001436 | 1657856 | 0   |
| Contig2657 ref0000098 | 1817158 | 0   |
| Contig1612 ref0002723 | 1646916 | 95  |
| Contig381 ref0002354  | 1605454 | 0   |
| Contig1728 ref0000717 | 1639803 | 0   |
| Contig1956 ref0001644 | 1658271 | 0   |
| Contig414 ref0000290  | 1819778 | 0   |
| Contig2202 ref0001738 | 1583370 | 0   |
| Contig2444 ref0002296 | 1892359 | 65  |
| Contig1797 ref0001822 | 1916784 | 0   |
| Contig603 ref0002520  | 1876670 | 71  |
| Contig1428 ref0002224 | 1561476 | 118 |
| Contig2030 ref0001025 | 1773527 | 112 |
| Contig879 ref0001527  | 1682802 | 81  |
| Contig127 ref0001508  | 2016826 | 0   |
| Contig1248 ref0000497 | 1664696 | 99  |
| Contig1120 ref0000677 | 1543045 | 0   |
| Contig2320 ref0001045 | 1984249 | 0   |
| Contig1373 ref0001418 | 1753306 | 63  |
| Contig740 ref0000171  | 1598844 | 52  |
| Contig2395 ref0002837 | 2064681 | 67  |
| Contig1195 ref0002537 | 2494347 | 0   |
| Contig9 ref0000581    | 1862849 | 0   |
| Contig2120 ref0002414 | 2118665 | 0   |
| Contig1482 ref0000473 | 1792486 | 0   |
| Contig1930 ref0000503 | 1556632 | 0   |
| Contig1296 ref0002684 | 2027245 | 0   |
| Contig2258 ref0002645 | 1952506 | 0   |
| Contig1526 ref0002335 | 2498417 | 0   |
| Contig2082 ref0002804 | 1644651 | 74  |
| Contig957 ref0000379  | 1864406 | 0   |
| Contig1037 ref0001078 | 1581059 | 64  |
| Contig2021 ref0000814 | 1993050 | 0   |
| Contig2523 ref0002632 | 1769933 | 106 |
| Contig1261 ref0000029 | 2099369 | 0   |
| Contig40 ref0000131   | 1637749 | 0   |
| Contig1006 ref0000870 | 1708930 | 123 |
| Contig1710 ref0002595 | 1886258 | 124 |
| Contig369 ref0000204  | 1999883 | 58  |
| Contig152 ref0000864  | 1792263 | 0   |
| Contig692 ref0002662  | 1658111 | 139 |

|                       |         |     |
|-----------------------|---------|-----|
| Contig390 ref0001270  | 1957087 | 81  |
| Contig524 ref0002400  | 1764884 | 118 |
| Contig1054 ref0002695 | 1913154 | 62  |
| Contig1623 ref0001214 | 1681171 | 0   |
| Contig715 ref0002151  | 1682711 | 0   |
| Contig542 ref0000697  | 1982980 | 0   |
| Contig2664 ref0000321 | 1815245 | 68  |
| Contig64 ref0000599   | 1824325 | 157 |
| Contig2755 ref0002428 | 1755840 | 53  |
| Contig2473 ref0000129 | 1895385 | 0   |
| Contig2152 ref0001174 | 2087647 | 71  |
| Contig1495 ref0001444 | 2089537 | 0   |
| Contig1124 ref0000681 | 1810283 | 0   |
| Contig1032 ref0001073 | 2113568 | 0   |
| Contig2814 ref0001876 | 1998146 | 0   |
| Contig1665 ref0000434 | 1894524 | 150 |
| Contig1790 ref0001817 | 1939036 | 125 |
| Contig1980 ref0002317 | 2109454 | 117 |
| Contig2005 ref0001281 | 2070210 | 76  |
| Contig712 ref0002150  | 2226453 | 0   |
| Contig2507 ref0002278 | 2100441 | 74  |
| Contig1365 ref0001176 | 1822322 | 0   |
| Contig1995 ref0000611 | 1815313 | 0   |
| Contig0 ref0000576    | 1832933 | 0   |
| Contig1800 ref0000450 | 2132932 | 97  |
| Contig1708 ref0001466 | 1829850 | 0   |
| Contig1203 ref0001370 | 2007485 | 122 |
| Contig2722 ref0000078 | 1651247 | 0   |
| Contig162 ref0000638  | 2304336 | 70  |
| Contig1814 ref0000227 | 2139882 | 89  |
| Contig2626 ref0001225 | 2212703 | 0   |
| Contig2894 ref0000908 | 2178577 | 0   |
| Contig986 ref0000142  | 2255286 | 99  |
| Contig2218 ref0002146 | 2142472 | 103 |
| Contig2810 ref0000989 | 2214725 | 153 |
| Contig1309 ref0001638 | 2349888 | 85  |
| Contig2035 ref0001020 | 2487517 | 0   |
| Contig833 ref0002105  | 2357887 | 0   |
| Contig695 ref0002657  | 2693286 | 98  |
| Contig2492 ref0001462 | 2600919 | 138 |
| Contig2478 ref0001929 | 2364647 | 103 |
| Contig2559 ref0001275 | 2318716 | 185 |
| Contig2165 ref0002242 | 2805473 | 67  |
| Contig209 ref0000909  | 2560382 | 0   |
| Contig501 ref0002749  | 2768538 | 98  |
| Contig1668 ref0000433 | 2350273 | 0   |
| Contig1159 ref0002142 | 2770261 | 0   |
| Contig2829 ref0001200 | 2742525 | 217 |
| Contig2589 ref0001000 | 2879601 | 111 |
| Contig1926 ref0000274 | 2861216 | 0   |
| Contig1642 ref0002048 | 2668262 | 113 |



|                       |         |     |
|-----------------------|---------|-----|
| Contig247 ref0001786  | 2697503 | 0   |
| Contig1631 ref0002368 | 2781057 | 0   |
| Contig630 ref0002361  | 2838310 | 0   |
| Contig2241 ref0002455 | 3097619 | 90  |
| Contig1658 ref0000683 | 2809023 | 134 |
| Contig816 ref0001954  | 3130047 | 106 |
| Contig2711 ref0001870 | 3042805 | 97  |
| Contig1519 ref0002907 | 2303650 | 0   |
| Contig1810 ref0000231 | 2866924 | 130 |
| Contig157 ref0000859  | 2727513 | 0   |
| Contig1438 ref0002033 | 3188244 | 82  |
| Contig1991 ref0000295 | 3111116 | 0   |
| Contig2791 ref0000757 | 3072570 | 0   |
| Contig1558 ref0002158 | 3061608 | 135 |
| Contig1579 ref0001810 | 3231187 | 103 |
| Contig2011 ref0001503 | 3432469 | 109 |
| Contig2245 ref0002451 | 2994898 | 110 |
| Contig371 ref0002920  | 3273727 | 121 |
| Contig1450 ref0002408 | 3238893 | 104 |
| Contig195 ref0002722  | 3189232 | 0   |
| Contig1493 ref0001429 | 2961086 | 177 |
| Contig265 ref0001715  | 3044142 | 0   |
| Contig1002 ref0001936 | 3194487 | 202 |
| Contig1472 ref0002758 | 3215882 | 0   |
| Contig1238 ref0000719 | 2981183 | 0   |
| Contig463 ref0001399  | 3229337 | 109 |
| Contig2426 ref0000543 | 3224334 | 87  |
| Contig1777 ref0001792 | 2710893 | 0   |
| Contig510 ref0000612  | 3076795 | 159 |
| Contigl ref0000575    | 3526998 | 98  |
| Contig1835 ref0001834 | 3992156 | 0   |
| Contig1871 ref0001872 | 3699471 | 0   |
| Contig1457 ref0002403 | 3670362 | 0   |
| Contig836 ref0002093  | 3138004 | 0   |
| Contig574 ref0000012  | 3154921 | 0   |
| Contig1281 ref0002887 | 3480323 | 0   |
| Contig2823 ref0001206 | 3657587 | 139 |
| Contig2668 ref0000329 | 3703665 | 156 |
| Contig1875 ref0002738 | 3533489 | 0   |
| Contig2069 ref0002824 | 3529192 | 119 |
| Contig732 ref0002492  | 2981294 | 280 |
| Contig1521 ref0002342 | 3077289 | 0   |
| Contig2392 ref0002842 | 3585851 | 138 |
| Contig216 ref0001123  | 3571395 | 0   |
| Contig2340 ref0002310 | 3939987 | 0   |
| Contig624 ref0002187  | 3716331 | 0   |
| Contig424 ref0000515  | 3543359 | 210 |
| Contig2866 ref0001881 | 3724550 | 117 |
| Contig303 ref0000670  | 4087713 | 221 |
| Contig759 ref0002871  | 3820484 | 0   |
| Contig2608 ref0000797 | 4443625 | 144 |

|            |            |          |     |
|------------|------------|----------|-----|
| Contig2117 | ref0001702 | 4363817  | 0   |
| Contig2139 | ref0001254 | 4424270  | 0   |
| Contig358  | ref0002516 | 3954464  | 186 |
| Contig1137 | ref0000897 | 4200025  | 125 |
| Contig690  | ref0002660 | 4132851  | 151 |
| Contig750  | ref0002677 | 4355316  | 188 |
| Contig651  | ref0002580 | 4229260  | 0   |
| Contig2723 | ref0000077 | 4709776  | 0   |
| Contig2832 | ref0001599 | 4061581  | 195 |
| Contig1818 | ref0000234 | 4710542  | 192 |
| Contig2017 | ref0001497 | 4649653  | 0   |
| Contig548  | ref0000689 | 4685848  | 239 |
| Contig1363 | ref0001182 | 5301524  | 194 |
| Contig975  | ref0002877 | 4856599  | 188 |
| Contig342  | ref0001746 | 5441041  | 120 |
| Contig835  | ref0002092 | 5126625  | 186 |
| Contig722  | ref0002672 | 5041616  | 160 |
| Contig674  | ref0001626 | 5218826  | 177 |
| Contig1744 | ref0000444 | 5142023  | 0   |
| Contig1233 | ref0000714 | 4851045  | 0   |
| Contig1258 | ref0000254 | 5602675  | 0   |
| Contig126  | ref0001507 | 5101076  | 0   |
| Contig83   | ref0002612 | 5162191  | 0   |
| Contig1858 | ref0002381 | 5671722  | 0   |
| Contig819  | ref0001963 | 5551227  | 182 |
| Contig2013 | ref0001501 | 5704433  | 254 |
| Contig2928 | ref0000769 | 5997497  | 0   |
| Contig229  | ref0000457 | 6219004  | 0   |
| Contig757  | ref0002666 | 5675505  | 309 |
| Contig1620 | ref0001208 | 6160183  | 247 |
| Contig2210 | ref0001946 | 6645983  | 199 |
| Contig2155 | ref0000721 | 6210988  | 0   |
| Contig2282 | ref0000361 | 6215404  | 302 |
| Contig2567 | ref0001931 | 7003029  | 185 |
| Contig1879 | ref0002735 | 6607739  | 0   |
| Contig1916 | ref0000945 | 7255963  | 233 |
| Contig1743 | ref0000456 | 7943970  | 0   |
| Contig1406 | ref0001868 | 7746464  | 287 |
| Contig2366 | ref0001919 | 8125951  | 0   |
| Contig1920 | ref0000272 | 7593296  | 235 |
| Contig629  | ref0002198 | 7472585  | 348 |
| Contig1838 | ref0000744 | 8680253  | 0   |
| Contig337  | ref0000886 | 8893252  | 0   |
| Contig1392 | ref0000431 | 11531354 | 360 |
| Contig1867 | ref0000005 | 3246     | 0   |
| Contig1262 | ref0000032 | 14908    | 0   |
| Contig2873 | ref0000039 | 23588    | 0   |
| Contig984  | ref0000140 | 5729     | 0   |
| Contig1079 | ref0000193 | 30799    | 0   |
| Contig1944 | ref0000301 | 36729    | 0   |
| Contig2868 | ref0000317 | 28102    | 0   |

|            |            |        |   |
|------------|------------|--------|---|
| Contig2288 | ref0000369 | 3255   | 0 |
| Contig178  | ref0000396 | 10744  | 0 |
| Contig1060 | ref0000398 | 26840  | 0 |
| Contig1065 | ref0000401 | 13668  | 0 |
| Contig311  | ref0000420 | 25027  | 0 |
| Contig423  | ref0000516 | 28495  | 0 |
| Contig898  | ref0000654 | 39907  | 0 |
| Contig1230 | ref0000715 | 18587  | 0 |
| Contig2338 | ref0000831 | 16975  | 0 |
| Contig2103 | ref0001034 | 45108  | 0 |
| Contig2328 | ref0001043 | 9560   | 0 |
| Contig859  | ref0001084 | 43014  | 0 |
| Contig1101 | ref0001101 | 51761  | 0 |
| Contig1832 | ref0001127 | 1977   | 0 |
| Contig132  | ref0001293 | 22293  | 0 |
| Contig1683 | ref0001340 | 40975  | 0 |
| Contig1379 | ref0001426 | 43122  | 0 |
| Contig2639 | ref0001455 | 70925  | 0 |
| Contig2303 | ref0001481 | 13880  | 0 |
| Contig580  | ref0001556 | 4181   | 0 |
| Contig673  | ref0001621 | 27141  | 0 |
| Contig2801 | ref0001667 | 43295  | 0 |
| Contig2574 | ref0001722 | 4728   | 0 |
| Contig2572 | ref0001728 | 6522   | 0 |
| Contig2205 | ref0001745 | 24545  | 0 |
| Contig249  | ref0001780 | 196690 | 1 |
| Contig2212 | ref0001948 | 13929  | 0 |
| Contig2176 | ref0002067 | 42149  | 0 |
| Contig2876 | ref0002118 | 27700  | 0 |
| Contig535  | ref0002210 | 19728  | 0 |
| Contig1529 | ref0002334 | 14177  | 0 |
| Contig1187 | ref0002376 | 1393   | 0 |
| Contig2538 | ref0002438 | 47143  | 0 |
| Contig2532 | ref0002442 | 33971  | 0 |
| Contig2401 | ref0002470 | 67258  | 0 |
| Contig2741 | ref0002617 | 25026  | 0 |
| Contig2254 | ref0002637 | 17941  | 0 |
| Contig2410 | ref0002649 | 3784   | 0 |
| Contig751  | ref0002671 | 50979  | 0 |
| Contig1474 | ref0002760 | 11677  | 0 |
| Contig2735 | ref0002795 | 6084   | 0 |
| Contig2644 | ref0002819 | 27666  | 0 |
| Contig1283 | ref0002885 | 13751  | 0 |



14  
15  
15  
15  
16  
17  
17  
18  
18  
19  
19  
19  
20  
20  
21  
22  
23  
24  
25  
25  
26  
26  
27  
27  
27  
27  
27  
28  
28  
28  
29  
29  
30  
31  
31  
31  
32  
32  
32  
33  
33  
34  
34  
34  
35  
35  
35  
35  
35  
36  
36

36  
37  
37  
38  
38  
39  
39  
39  
39  
40  
40  
41  
41  
41  
43  
43  
43  
43  
43  
44  
44  
44  
45  
45  
46  
46  
46  
46  
46  
47  
48  
48  
49  
49  
50  
50  
51  
51  
53  
53  
54  
54  
54  
54  
54  
55  
56  
56  
57  
57  
58  
59

59  
59  
59  
60  
60  
60  
61  
61  
61  
61  
61  
61  
62  
62  
62  
62  
64  
64  
65  
66  
67  
67  
67  
68  
69  
70  
70  
70  
71  
71  
73  
74  
75  
75  
75  
76  
77  
77  
77  
78  
78  
79  
79  
79  
81  
82  
83  
83  
85  
86  
86  
88

88  
89  
89  
90  
90  
91  
91  
92  
93  
93  
93  
94  
94  
95  
96  
96  
96  
97  
98  
99  
99  
100  
100  
100  
100  
101  
104  
105  
108  
108  
109  
109  
109  
109  
110  
112  
113  
115  
115  
116  
116  
116  
117  
117  
119  
121  
121  
122  
122  
122  
122  
123



124  
124  
126  
127  
128  
130  
130  
130  
132  
132  
132  
132  
133  
133  
135  
136  
137  
138  
139  
140  
141  
141  
142  
143  
144  
145  
151  
151  
152  
152  
152  
155  
156  
158  
158  
159  
159  
159  
163  
163  
164  
165  
166  
172  
173  
175  
176  
177  
178  
180  
181

181  
182  
182  
183  
184  
185  
186  
186  
188  
188  
189  
189  
190  
191  
193  
194  
195  
196  
205  
206  
213  
215  
216  
216  
219  
221  
224  
224  
225  
225  
226  
228  
230  
233  
233  
237  
238  
240  
245  
246  
246  
246  
248  
249  
250  
250  
251  
253  
254  
255  
256

256  
256  
257  
259  
260  
264  
264  
267  
269  
275  
279  
279  
281  
282  
282  
283  
290  
290  
290  
293  
294  
295  
296  
296  
305  
306  
307  
307  
308  
310  
313  
316  
321  
322  
322  
324  
325  
330  
333  
333  
338  
339  
342  
348  
354  
355  
355  
355  
358  
359  
364

364  
364  
367  
368  
371  
373  
374  
378  
379  
383  
384  
386  
386  
389  
389  
391  
392  
394  
397  
404  
410  
412  
413  
416  
416  
420  
422  
431  
432  
436  
439  
447  
448  
449  
465  
467  
469  
472  
476  
478  
481  
486  
492  
494  
496  
498  
502  
506  
506  
508  
512

512  
516  
516  
520  
521  
523  
526  
531  
534  
535  
538  
539  
539  
543  
544  
546  
548  
551  
570  
576  
576  
577  
585  
589  
603  
603  
605  
608  
613  
613  
616  
619  
620  
622  
640  
646  
648  
652  
655  
655  
660  
660  
662  
662  
667  
669  
671  
671  
679  
681  
682

683  
706  
708  
711  
713  
718  
719  
723  
725  
726  
726  
732  
732  
734  
737  
742  
743  
744  
745  
748  
752  
755  
756  
768  
771  
772  
772  
772  
773  
773  
774  
780  
783  
786  
798  
805  
806  
806  
810  
811  
812  
813  
814  
818  
818  
820  
820  
830  
832  
832  
834

836  
838  
839  
845  
852  
852  
855  
857  
858  
866  
867  
877  
883  
887  
891  
893  
897  
898  
905  
905  
908  
919  
921  
938  
961  
965  
970  
986  
986  
994  
994  
996  
998  
999  
999  
1001  
1005  
1012  
1015  
1032  
1034  
1035  
1035  
1039  
1041  
1045  
1053  
1058  
1059  
1064  
1078

1079  
1082  
1086  
1086  
1092  
1094  
1096  
1101  
1104  
1109  
1111  
1113  
1114  
1132  
1133  
1136  
1139  
1142  
1142  
1151  
1157  
1160  
1161  
1161  
1165  
1176  
1187  
1188  
1191  
1196  
1201  
1204  
1207  
1214  
1216  
1216  
1218  
1219  
1224  
1228  
1229  
1233  
1236  
1241  
1245  
1246  
1251  
1255  
1256  
1261  
1267



1282  
1290  
1293  
1296  
1302  
1302  
1325  
1333  
1338  
1345  
1349  
1354  
1356  
1357  
1367  
1375  
1379  
1381  
1382  
1385  
1394  
1397  
1400  
1406  
1416  
1423  
1426  
1442  
1465  
1466  
1475  
1505  
1505  
1511  
1512  
1522  
1522  
1554  
1557  
1560  
1566  
1569  
1573  
1580  
1591  
1599  
1617  
1619  
1620  
1639  
1647

1650  
1664  
1693  
1711  
1716  
1720  
1728  
1735  
1736  
1737  
1742  
1753  
1756  
1758  
1767  
1769  
1773  
1779  
1790  
1802  
1808  
1809  
1825  
1829  
1839  
1840  
1841  
1848  
1856  
1859  
1863  
1873  
1874  
1875  
1880  
1890  
1897  
1898  
1901  
1913  
1914  
1926  
1951  
1953  
1963  
1964  
1981  
1981  
2012  
2018  
2025

2031  
2031  
2040  
2043  
2053  
2054  
2065  
2065  
2068  
2072  
2078  
2081  
2082  
2089  
2089  
2096  
2110  
2113  
2117  
2119  
2153  
2171  
2198  
2209  
2226  
2247  
2256  
2327  
2344  
2348  
2387  
2404  
2423  
2428  
2440  
2453  
2464  
2488  
2569  
2600  
2623  
2670  
2693  
2694  
2751  
2766  
2789  
2799  
2801  
2809  
2843

2853  
2881  
2904  
2953  
2957  
2958  
2963  
2981  
2987  
3028  
3043  
3061  
3061  
3062  
3099  
3102  
3133  
3133  
3154  
3161  
3204  
3210  
3249  
3295  
3302  
3339  
3369  
3393  
3397  
3487  
3497  
3501  
3507  
3513  
3577  
3588  
3608  
3609  
3625  
3631  
3666  
3708  
3767  
3805  
3832  
3905  
3995  
3999  
4044  
4128  
4132

4201  
4249  
4316  
4321  
4366  
4478  
4487  
4653  
4774  
4871  
4938  
4986  
5125  
5128  
5149  
5197  
5272  
5292  
5328  
5396  
5501  
5596  
5616  
5775  
5784  
5866  
5891  
6077  
6194  
6317  
6515  
6669  
6693  
6940  
6949  
7430  
7819  
8054  
8061  
8100  
8177  
8631  
9469  
11410  
0  
0  
0  
0  
0  
0  
0

[illegible]
