# Supplementary material for: Population Genomic Analyses Suggest a Hybrid Origin, Cryptic Sexuality, and Decay of Genes Regulating Seed Development for the Putatively Strictly Asexual Kingdonia uniflora (Circaeasteraceae, Ranunculales)
Source: MDPI journal article supplement (doi:10.3390/ijms24021451), 2023-01-11
Supplement: s1 [file s1]

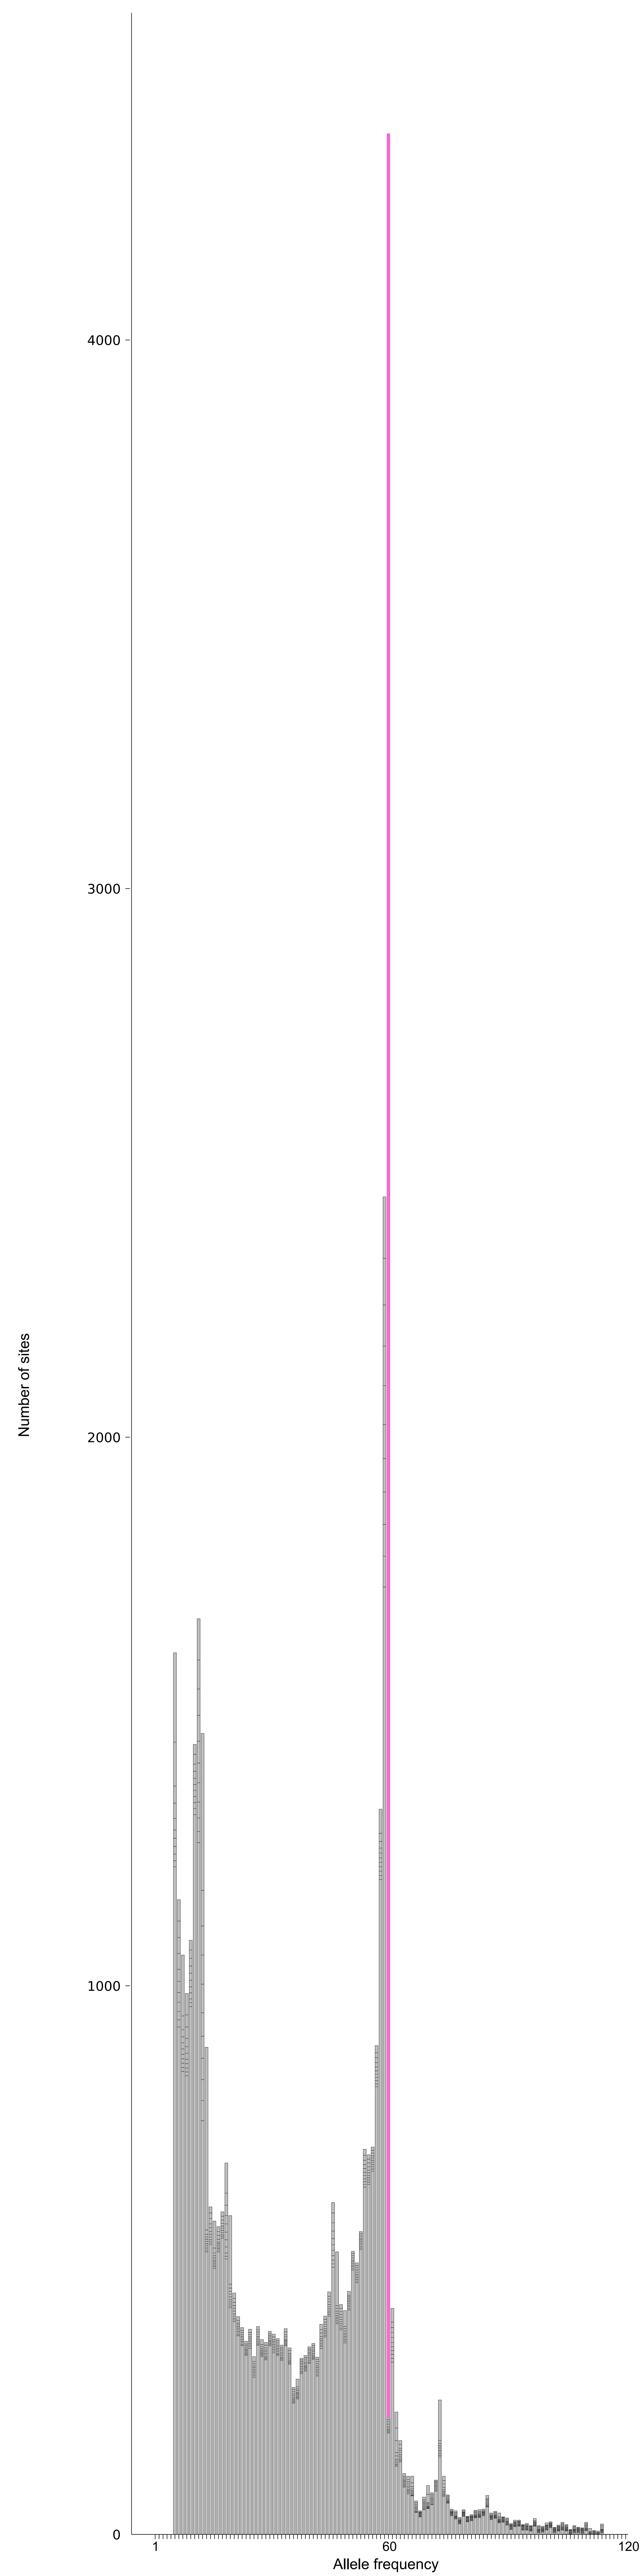

Supplemental Fig. S4 The site frequency spectrum (SFS) depicting the number of sites with different allele frequency across 60 *K. unilora* individuals (one allele can display a maximum frequency of 120 among 60 diploid individuals). Heterozygous genotypes shared among all 60 individuals are highlighted using the purple color.
