# Supplementary material for: Population Genomic Analyses Suggest a Hybrid Origin, Cryptic Sexuality, and Decay of Genes Regulating Seed Development for the Putatively Strictly Asexual Kingdonia uniflora (Circaeasteraceae, Ranunculales)
Source: MDPI journal article supplement (doi:10.3390/ijms24021451), 2023-01-11
Supplement: s1 [file s1]

```

1  #!/usr/bin/perl
2  # use strict;
3  #FL1, fasta格式文件
4  #FL2, 序列名称, 不含有>符号
5  open(FL0, "$ARGV[0]") || die ;
6  open(FL1, "$ARGV[1]") || die ;
7  open(OUT, ">$ARGV[2]") || die ;
8  open(OUT1, ">$ARGV[3]") || die ;
9
10 @inter = <FL0>;
11 chomp @inter;
12
13 @arr1=<FL1>;
14 chomp @arr1;
15
16 for($i=0;$i<@arr1;$i++){
17     if ($arr1[$i] =~ /^>/){
18         @tem= split (/\/, $arr1[$i]);
19         $tem[0] =~ s/>(.*?)\/$1/;
20         if ($tem[0] ~~ @inter){
21             #cds
22                 $arr1[$i+1] = substr ($arr1[$i+1], 0, length($arr1[$i+1])-3);
23             #pro
24             #     $arr1[$i+1] = substr ($arr1[$i+1], 0, length($arr1[$i+1])-1);
25             print OUT1 $arr1[$i], "\n", $arr1[$i+1], "\n";}
26         else {
27             #cds
28                 $arr1[$i+1] = substr ($arr1[$i+1], 0, length($arr1[$i+1])-3);
29             #pro
30             #     $arr1[$i+1] = substr ($arr1[$i+1], 0, length($arr1[$i+1])-1);
31             print OUT $arr1[$i], "\n", $arr1[$i+1], "\n";}
32         }
33     }

```
