# Supplementary material for: Population Genomic Analyses Suggest a Hybrid Origin, Cryptic Sexuality, and Decay of Genes Regulating Seed Development for the Putatively Strictly Asexual Kingdonia uniflora (Circaeasteraceae, Ranunculales)
Source: Int J Mol Sci. 2023 Jan 11;24(2):1451. doi: 10.3390/ijms24021451 (PMC9866071; doi:10.3390/ijms24021451)
Supplement: Supplementary file 1 [file ijms-24-01451-s001.zip]

Archive with 11 entries (11 files):
- GetSnpSeq.pl.pdf
- Supplemental Table S2.pdf
- Supplemental_ Notes_revision.pdf
- Supplemental_Figure S1-S3, S5-S6, Table S1, S3, S4_revision.pdf
- Supplemental_Figure S4.pdf
- Supplemental_Methods.txt
- Supplemental_Methods_batchRenameSeq.pl.pdf
- Supplemental_Methods_ConnectSeq.pl.pdf
- Supplemental_Methods_GetNoInterCodonSeq.pl.pdf
- Supplemental_Methods_GetSampleGenome.sh.pdf
- Supplemental_Methods_SplitProByStopCodon.pl.pdf
