# Supplementary material for: Population Genomic Analyses Suggest a Hybrid Origin, Cryptic Sexuality, and Decay of Genes Regulating Seed Development for the Putatively Strictly Asexual Kingdonia uniflora (Circaeasteraceae, Ranunculales)
Source: Int J Mol Sci. 2023 Jan 11;24(2):1451. doi: 10.3390/ijms24021451 (PMC9866071; doi:10.3390/ijms24021451)
Supplement: Supplementary file 1 [file ijms-24-01451-s001.zip › Supplemental_Methods.txt]

#Based on SNP files, for each sample, its genome sequence, protein,cDNA sequences were annotated.  
sh GetSampleGenome.sh
#Batch rename and merge the sequences of samples
perl batchRenameSeq.pl list.txt combine.cds.re.fasta
perl batchRenameSeq.pl list.txt combine.pro.re.fasta
#Split the merged protein sequence into noInterCodon and InterCodon types, and obtain the InterCodon gene list
perl SplitProByStopCodon.pl combine.pro.re.fasta combine.pro.re.noInterCodon.fasta combine.pro.re.InterCodon.fasta
#Get merged cDNA sequences without intercodon
perl GetNoInterCodonSeq.pl interCodon.txt combine.cds.re.fasta combine.cds.re.filterred.fasta combine.cds.re.filterredstop.fasta
#Connect orthologe cDNA sequences from samples
perl ConnectSeq.pl combine.cds.re.filterred.fasta combine.cds.re.filterred.raw.fasta combine.cds.re.filterred.connected.fasta
